# Supplementary material for: Bilberry (Vaccinium myrtillus L.) Extracts Comparative Analysis Regarding Their Phytonutrient Profiles, Antioxidant Capacity along with the In Vivo Rescue Effects Tested on a Drosophila melanogaster High-Sugar Diet Model
Source: PubMed Central journal article supplement (PMC7694118; doi:10.3390/antiox9111067), 2020-10-30
Supplement: antioxidants-09-01067-s001.pdf [file antioxidants-09-01067-s001.pdf]

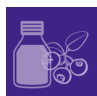

## Supplementary Materials

**Table S1.** Chemical composition of the ripe bilberry fruit aqueous extract (E1) determined using UHPLC-ESI-MS/MS. The chemical classification of the compounds was assigned for all compounds, along with the presented molecular formula, retention time (RT), radical molecular cations (M [+]) and anions (M [-]). Fragmentation pattern was omitted and can be found in **Table S4**.

| No. | Chemical classification | Compound                                                    | Molecular formula                                             | RT    | M [+]     | M [-]     |
|-----|-------------------------|-------------------------------------------------------------|---------------------------------------------------------------|-------|-----------|-----------|
| 1   | Amino acid              | Lysine                                                      | C <sub>6</sub> H <sub>14</sub> N <sub>2</sub> O <sub>2</sub>  | 1.08  | 147.11336 |           |
| 2   | Alkaloid                | Choline                                                     | C <sub>5</sub> H <sub>14</sub> NO                             | 1.16  | 104.10754 |           |
| 3   | Amino acid              | Arginine                                                    | C <sub>6</sub> H <sub>14</sub> N <sub>4</sub> O <sub>2</sub>  | 1.16  | 175.11951 |           |
| 4   | Amino acid              | Histidine                                                   | C <sub>6</sub> H <sub>9</sub> N <sub>3</sub> O <sub>2</sub>   | 1.16  | 156.07731 |           |
| 5   | Amino acid              | γ-Aminobutyric acid                                         | C <sub>4</sub> H <sub>9</sub> NO <sub>2</sub>                 | 1.19  | 104.07116 |           |
| 6   | Amino acid              | Glutamic acid                                               | C <sub>5</sub> H <sub>9</sub> NO <sub>4</sub>                 | 1.20  | 148.06099 |           |
| 7   | Amino acid              | Threonine                                                   | C <sub>4</sub> H <sub>9</sub> NO <sub>3</sub>                 | 1.20  | 120.06607 |           |
| 8   | Sugar                   | Saccharic acid                                              | C <sub>6</sub> H <sub>10</sub> O <sub>8</sub>                 | 1.20  |           | 209.02975 |
| 9   | Miscellaneous           | 5-Hydroxymethyl-2-furaldehyde                               | C <sub>6</sub> H <sub>6</sub> O <sub>3</sub>                  | 1.24  | 127.03952 |           |
| 10  | Lactone                 | Gulonic acid γ-lactone or δ-Gluconic acid δ-lactone         | C <sub>6</sub> H <sub>10</sub> O <sub>6</sub>                 | 1.27  | 179.05557 |           |
| 11  | Miscellaneous           | 5-Methyl-2-furaldehyde                                      | C <sub>6</sub> H <sub>6</sub> O <sub>2</sub>                  | 1.29  | 111.04461 |           |
| 12  | Vitamin                 | Nicotinic acid (Niacin,B3)                                  | C <sub>6</sub> H <sub>5</sub> NO <sub>2</sub>                 | 1.44  | 124.03986 |           |
| 13  | Amino acid              | Tyrosine                                                    | C <sub>9</sub> H <sub>11</sub> NO <sub>3</sub>                | 1.71  | 182.08172 |           |
| 14  | Carboxylic acid         | Gallic acid (3,4,5-Trihydroxybenzoic acid)                  | C <sub>7</sub> H <sub>6</sub> O <sub>5</sub>                  | 2.26  |           | 169.01370 |
| 15  | Amino acid              | Phenylalanine                                               | C <sub>9</sub> H <sub>11</sub> NO <sub>2</sub>                | 3.19  | 166.08681 |           |
| 16  | Flavonoid               | Gallocatechin                                               | C <sub>15</sub> H <sub>14</sub> O <sub>7</sub>                | 4.23  |           | 305.06613 |
| 17  | Amino acid              | Tryptophan                                                  | C <sub>11</sub> H <sub>12</sub> N <sub>2</sub> O <sub>2</sub> | 8.12  | 205.09771 |           |
| 18  | Ester                   | Methyl gallate                                              | C <sub>8</sub> H <sub>8</sub> O <sub>5</sub>                  | 8.42  |           | 183.02935 |
| 19  | Flavonoid               | Procyanidin B1 or B3                                        | C <sub>30</sub> H <sub>26</sub> O <sub>12</sub>               | 11.85 | 579.15025 |           |
| 20  | Flavonoid               | Catechin                                                    | C <sub>15</sub> H <sub>14</sub> O <sub>6</sub>                | 13.20 |           | 289.07121 |
| 21  | Flavonoid               | Epigallocatechin                                            | C <sub>15</sub> H <sub>14</sub> O <sub>7</sub>                | 13.47 |           | 305.06613 |
| 22  | Flavonoid               | Catechin or Epicatechin-O-hexoside                          | C <sub>21</sub> H <sub>24</sub> O <sub>11</sub>               | 14.00 |           | 451.12404 |
| 23  | Polyphenol              | Chlorogenic acid (3-O-Caffeoylquinic acid)                  | C <sub>16</sub> H <sub>18</sub> O <sub>9</sub>                | 14.12 | 355.10291 |           |
| 24  | Carboxylic acid         | Caffeic acid                                                | C <sub>9</sub> H <sub>8</sub> O <sub>4</sub>                  | 14.28 |           | 179.03444 |
| 25  | Flavonoid               | Procyanidin B1 or B3                                        | C <sub>30</sub> H <sub>26</sub> O <sub>12</sub>               | 15.15 | 579.15025 |           |
| 26  | Flavonoid               | Cinnamtannin D1                                             | C <sub>45</sub> H <sub>36</sub> O <sub>18</sub>               | 15.24 |           | 863.18234 |
| 27  | Carboxylic acid         | Dimethoxy-hydroxycinnamic acid                              | C <sub>11</sub> H <sub>12</sub> O <sub>5</sub>                | 15.60 | 225.07630 |           |
| 28  | Flavonoid               | Cinnamtannin B1                                             | C <sub>45</sub> H <sub>36</sub> O <sub>18</sub>               | 15.78 |           | 863.18234 |
| 29  | Flavonoid               | Delphinidin-3-O-galactoside (Empetrin)                      | C <sub>21</sub> H <sub>21</sub> O <sub>12</sub>               | 16.17 | 465.10330 |           |
| 30  | Polyphenol              | Coumaroylquinic acid isomer 1                               | C <sub>16</sub> H <sub>18</sub> O <sub>8</sub>                | 16.83 |           | 337.09235 |
| 31  | Flavonoid               | Epicatechin                                                 | C <sub>15</sub> H <sub>14</sub> O <sub>6</sub>                | 17.02 |           | 289.07121 |
| 32  | Flavonoid               | Delphinidin-3-O-arabinoside                                 | C <sub>20</sub> H <sub>19</sub> O <sub>11</sub>               | 17.03 | 435.09274 |           |
| 33  | Flavonoid               | Idaein (Idein, Cyanidin-3-O-galactoside)                    | C <sub>21</sub> H <sub>21</sub> O <sub>11</sub>               | 17.06 | 449.10839 |           |
| 34  | Flavonoid               | Cyanidin-3-O-glucoside (Kuromanin, Asterin, Chrysanthemine) | C <sub>21</sub> H <sub>21</sub> O <sub>11</sub>               | 17.40 | 449.10839 |           |

| No. | Chemical classification | Compound                                                    | Molecular formula                               | RT    | M [+]     | M [-]     |
|-----|-------------------------|-------------------------------------------------------------|-------------------------------------------------|-------|-----------|-----------|
| 35  | Flavonoid               | Cyanidin-3-O-sambubioside (Sambicyanin, Gossypicyanin)      | C <sub>26</sub> H <sub>29</sub> O <sub>15</sub> | 17.71 | 581.15065 |           |
| 36  | Carboxylic acid         | 4-Coumaric acid                                             | C <sub>9</sub> H <sub>8</sub> O <sub>3</sub>    | 17.75 |           | 163.03952 |
| 37  | Flavonoid               | Cyanidin-3-O-arabinoside                                    | C <sub>20</sub> H <sub>19</sub> O <sub>10</sub> | 17.84 | 419.09783 |           |
| 38  | Polyphenol              | Caffeoylshikimic acid                                       | C <sub>16</sub> H <sub>16</sub> O <sub>8</sub>  | 17.93 |           | 335.07670 |
| 39  | Flavonoid               | Petunidin-3-O-galactoside                                   | C <sub>22</sub> H <sub>23</sub> O <sub>12</sub> | 17.97 | 479.11895 |           |
| 40  | Polyphenol              | Feruloylquinic acid                                         | C <sub>17</sub> H <sub>20</sub> O <sub>9</sub>  | 17.97 |           | 367.10291 |
| 41  | Flavonoid               | Petunidin-3-O-arabinoside                                   | C <sub>21</sub> H <sub>21</sub> O <sub>11</sub> | 18.36 | 449.10839 |           |
| 42  | Flavonoid               | Pelargonidin-O-hexoside                                     | C <sub>21</sub> H <sub>21</sub> O <sub>10</sub> | 18.47 | 433.11347 |           |
| 43  | Flavonoid               | Peonidin-O-hexoside                                         | C <sub>22</sub> H <sub>23</sub> O <sub>11</sub> | 18.89 | 463.12404 |           |
| 44  | Flavonoid               | Malvidin-O-hexoside                                         | C <sub>23</sub> H <sub>25</sub> O <sub>12</sub> | 19.04 | 493.13460 |           |
| 45  | Polyphenol              | Coumaroylquinic acid isomer 2                               | C <sub>16</sub> H <sub>18</sub> O <sub>8</sub>  | 19.16 |           | 337.09235 |
| 46  | Carboxylic acid         | Ferulic acid                                                | C <sub>10</sub> H <sub>10</sub> O <sub>4</sub>  | 19.29 |           | 193.05009 |
| 47  | Flavonoid               | Peonidin-3-O-arabinoside                                    | C <sub>21</sub> H <sub>21</sub> O <sub>10</sub> | 19.41 | 433.11347 |           |
| 48  | Flavonoid               | Malvidin-3-O-arabinoside                                    | C <sub>22</sub> H <sub>23</sub> O <sub>11</sub> | 19.80 | 463.12404 |           |
| 49  | Miscellaneous           | N-(2-Phenylethyl)acetamide                                  | C <sub>10</sub> H <sub>13</sub> NO              | 20.10 | 164.10754 |           |
| 50  | Polyphenol              | Coumaroyl-shikimate                                         | C <sub>16</sub> H <sub>16</sub> O <sub>7</sub>  | 20.34 |           | 319.08178 |
| 51  | Flavonoid               | Myricetin-O-hexoside                                        | C <sub>21</sub> H <sub>20</sub> O <sub>13</sub> | 20.86 |           | 479.08257 |
| 52  | Flavonoid               | Myricetin-3-O-arabinoside                                   | C <sub>20</sub> H <sub>18</sub> O <sub>12</sub> | 20.97 |           | 449.07201 |
| 53  | Flavonoid               | Myricetin-O-pentoside isomer                                | C <sub>20</sub> H <sub>18</sub> O <sub>12</sub> | 21.81 |           | 449.07201 |
| 54  | Flavonoid               | Prunin (Naringenin 7-O-glucoside)                           | C <sub>21</sub> H <sub>22</sub> O <sub>10</sub> | 22.36 | 435.12912 |           |
| 55  | Flavonoid               | Hyperoside (Quercetin-3-O-galactoside, Hyperin)             | C <sub>21</sub> H <sub>20</sub> O <sub>12</sub> | 22.64 |           | 463.08765 |
| 56  | Flavonoid               | Quercetin-3-O-glucuronide                                   | C <sub>21</sub> H <sub>18</sub> O <sub>13</sub> | 22.66 |           | 477.06692 |
| 57  | Flavonoid               | Isoquercitrin (Hirsutrin, Quercetin-3-O-glucoside)          | C <sub>21</sub> H <sub>20</sub> O <sub>12</sub> | 22.87 |           | 463.08765 |
| 58  | Flavonoid               | Laricitrin (Myricetin-3'-O-methyl ether)                    | C <sub>16</sub> H <sub>12</sub> O <sub>8</sub>  | 23.19 | 333.06105 |           |
| 59  | Flavonoid               | Laricitrin-O-hexoside                                       | C <sub>22</sub> H <sub>22</sub> O <sub>13</sub> | 23.20 |           | 493.09822 |
| 60  | Flavonoid               | Avicularin (Quercetin-3-O-arabinofuranoside, Fencularin)    | C <sub>20</sub> H <sub>18</sub> O <sub>11</sub> | 23.47 |           | 433.07709 |
| 61  | Flavonoid               | Quercitrin (Quercetin-3-O-rhamnoside)                       | C <sub>21</sub> H <sub>20</sub> O <sub>11</sub> | 24.43 | 449.10839 |           |
| 62  | Flavonoid               | Kaempferol-3-O-glucuronide                                  | C <sub>21</sub> H <sub>18</sub> O <sub>12</sub> | 24.58 |           | 461.07200 |
| 63  | Flavonoid               | Quercetin-O-rhamnoside-O-pentoside                          | C <sub>26</sub> H <sub>28</sub> O <sub>15</sub> | 24.61 | 581.15065 |           |
| 64  | Flavonoid               | Syringetin-O-hexoside                                       | C <sub>23</sub> H <sub>24</sub> O <sub>13</sub> | 24.96 |           | 507.11387 |
| 65  | Flavonoid               | Isorhamnetin-O-glucuronide                                  | C <sub>22</sub> H <sub>20</sub> O <sub>13</sub> | 25.12 |           | 491.08257 |
| 66  | Terpenoid               | Abscisic acid                                               | C <sub>15</sub> H <sub>20</sub> O <sub>4</sub>  | 25.40 |           | 263.12834 |
| 67  | Flavonoid               | Quercetin-3-O-[3-Hydroxy-3-methylglutaroyl-(→4)-rhamnoside] | C <sub>27</sub> H <sub>28</sub> O <sub>15</sub> | 26.82 |           | 591.13500 |
| 68  | Flavonoid               | Pentahydroxyflavone                                         | C <sub>15</sub> H <sub>10</sub> O <sub>7</sub>  | 27.01 |           | 301.03483 |
| 69  | Flavonoid               | Naringenin                                                  | C <sub>15</sub> H <sub>12</sub> O <sub>5</sub>  | 27.25 |           | 271.06065 |

**Table S2.** Chemical composition of the ripe bilberry fruit methanolic extract (E2) determined using UHPLC-ESI-MS/MS. The chemical classification of the compounds was assigned for all compounds, along with the presented molecular formula, retention time (RT), radical molecular cations (M [+]) and anions (M [-]). Fragmentation pattern was omitted and can be found in **Table S4**.

| No. | Chemical classification | Compound                                                                    | Molecular formula                                             | RT    | M [+]     | M [-]     |
|-----|-------------------------|-----------------------------------------------------------------------------|---------------------------------------------------------------|-------|-----------|-----------|
| 1   | Amino acid              | Arginine                                                                    | C <sub>6</sub> H <sub>14</sub> N <sub>4</sub> O <sub>2</sub>  | 1.15  | 175.11951 |           |
| 2   | Amino acid              | Threonine                                                                   | C <sub>4</sub> H <sub>9</sub> NO <sub>3</sub>                 | 1.20  | 120.06607 |           |
| 3   | Amino acid              | Asparagine                                                                  | C <sub>4</sub> H <sub>8</sub> N <sub>2</sub> O <sub>3</sub>   | 1.21  | 133.06132 |           |
| 4   | Amino acid              | 2-Aminoadipic acid                                                          | C <sub>6</sub> H <sub>11</sub> NO <sub>4</sub>                | 1.22  | 162.07664 |           |
| 5   | Sugar                   | Saccharic acid                                                              | C <sub>6</sub> H <sub>10</sub> O <sub>8</sub>                 | 1.22  |           | 209.02975 |
| 6   | Vitamin                 | Adenine                                                                     | C <sub>5</sub> H <sub>5</sub> N <sub>5</sub>                  | 1.22  | 136.06233 |           |
| 7   | Vitamin                 | Nicotinic acid (Niacin, B <sub>3</sub> )                                    | C <sub>6</sub> H <sub>5</sub> NO <sub>2</sub>                 | 1.22  | 124.03986 |           |
| 8   | Miscellaneous           | 5-Hydroxymethyl-2-furaldehyde                                               | C <sub>6</sub> H <sub>6</sub> O <sub>3</sub>                  | 1.24  | 127.03952 |           |
| 9   | Miscellaneous           | 5-Methyl-2-furaldehyde                                                      | C <sub>6</sub> H <sub>6</sub> O <sub>2</sub>                  | 1.25  | 111.04461 |           |
| 10  | Lactone                 | Gulonic acid $\gamma$ -lactone or $\delta$ -Gluconic acid $\delta$ -lactone | C <sub>6</sub> H <sub>10</sub> O <sub>6</sub>                 | 1.28  | 179.05557 |           |
| 11  | Vitamin                 | Nicotinamide                                                                | C <sub>6</sub> H <sub>6</sub> N <sub>2</sub> O                | 1.44  | 123.05584 |           |
| 12  | Amino acid              | Tyrosine                                                                    | C <sub>9</sub> H <sub>11</sub> NO <sub>3</sub>                | 1.71  | 182.08172 |           |
| 13  | Amino acid              | Isoleucin or Leucin                                                         | C <sub>6</sub> H <sub>13</sub> NO <sub>2</sub>                | 1.83  | 132.10246 |           |
| 14  | Carboxylic acid         | Gallic acid (3,4,5-Trihydroxybenzoic acid)                                  | C <sub>7</sub> H <sub>6</sub> O <sub>5</sub>                  | 2.26  |           | 169.01370 |
| 15  | Amino acid              | Phenylalanine                                                               | C <sub>9</sub> H <sub>11</sub> NO <sub>2</sub>                | 3.02  | 166.08681 |           |
| 16  | Flavonoid               | Gallocatechin                                                               | C <sub>15</sub> H <sub>14</sub> O <sub>7</sub>                | 4.23  |           | 305.06613 |
| 17  | Amino acid              | Tryptophan                                                                  | C <sub>11</sub> H <sub>12</sub> N <sub>2</sub> O <sub>2</sub> | 7.98  | 205.09771 |           |
| 18  | Ester                   | Methyl gallate                                                              | C <sub>8</sub> H <sub>8</sub> O <sub>5</sub>                  | 8.46  |           | 183.02935 |
| 19  | Carboxylic acid         | Dihydroxy-methoxybenzoic acid                                               | C <sub>8</sub> H <sub>8</sub> O <sub>5</sub>                  | 11.19 |           | 183.02935 |
| 20  | Flavonoid               | Catechin                                                                    | C <sub>15</sub> H <sub>14</sub> O <sub>6</sub>                | 13.19 |           | 289.07121 |
| 21  | Flavonoid               | Epigallocatechin                                                            | C <sub>15</sub> H <sub>14</sub> O <sub>7</sub>                | 13.45 |           | 305.06613 |
| 22  | Flavonoid               | Catechin or Epicatechin-O-hexoside                                          | C <sub>21</sub> H <sub>24</sub> O <sub>11</sub>               | 13.94 |           | 451.12404 |
| 23  | Polyphenol              | Chlorogenic acid (3-O-Caffeoylquinic acid)                                  | C <sub>16</sub> H <sub>18</sub> O <sub>9</sub>                | 14.09 | 355.10291 |           |
| 24  | Carboxylic acid         | Caffeic acid                                                                | C <sub>9</sub> H <sub>8</sub> O <sub>4</sub>                  | 14.25 |           | 179.03444 |
| 25  | Flavonoid               | Procyanidin B1 or B3                                                        | C <sub>30</sub> H <sub>26</sub> O <sub>12</sub>               | 15.11 | 579.15025 |           |
| 26  | Flavonoid               | Cinnamtannin D1                                                             | C <sub>45</sub> H <sub>36</sub> O <sub>18</sub>               | 15.20 |           | 863.18234 |
| 27  | Miscellaneous           | Vanillin                                                                    | C <sub>8</sub> H <sub>8</sub> O <sub>3</sub>                  | 15.50 | 153.05517 |           |
| 28  | Carboxylic acid         | Dimethoxy-hydroxycinnamic acid                                              | C <sub>11</sub> H <sub>12</sub> O <sub>5</sub>                | 15.56 | 225.07630 |           |
| 29  | Flavonoid               | Cinnamtannin B1                                                             | C <sub>45</sub> H <sub>36</sub> O <sub>18</sub>               | 15.75 |           | 863.18234 |
| 30  | Flavonoid               | Delphinidin-3-O-galactoside (Empetrin)                                      | C <sub>21</sub> H <sub>21</sub> O <sub>12</sub>               | 15.90 | 465.10330 |           |
| 31  | Flavonoid               | Delphinidin-O-(pentosyl)hexoside                                            | C <sub>26</sub> H <sub>29</sub> O <sub>16</sub>               | 16.15 | 597.14556 |           |
| 32  | Flavonoid               | Delphinidin-3-O-arabinoside                                                 | C <sub>20</sub> H <sub>19</sub> O <sub>11</sub>               | 16.75 | 435.09274 |           |
| 33  | Flavonoid               | Ideaen (Idein, Cyanidin-3-O-galactoside)                                    | C <sub>21</sub> H <sub>21</sub> O <sub>11</sub>               | 16.76 | 449.10839 |           |
| 34  | Polyphenol              | Coumaroylquinic acid isomer 1                                               | C <sub>16</sub> H <sub>18</sub> O <sub>8</sub>                | 16.80 |           | 337.09235 |
| 35  | Flavonoid               | Epicatechin                                                                 | C <sub>15</sub> H <sub>14</sub> O <sub>6</sub>                | 17.00 |           | 289.07121 |
| 36  | Flavonoid               | Cyanidin-3-O-glucoside (Kuromanin, Asterin, Chrysanthemine)                 | C <sub>21</sub> H <sub>21</sub> O <sub>11</sub>               | 17.25 | 449.10839 |           |

| No. | Chemical classification | Compound                                                 | Molecular formula                               | RT    | M [+]     | M [-]     |
|-----|-------------------------|----------------------------------------------------------|-------------------------------------------------|-------|-----------|-----------|
| 37  | Flavonoid               | Cyanidin-3-O-sambubioside (Sambicyanin, Gossypicyanin)   | C <sub>26</sub> H <sub>29</sub> O <sub>15</sub> | 17.63 | 581.15065 |           |
| 38  | Flavonoid               | Petunidin-O-(pentosyl)hexoside                           | C <sub>27</sub> H <sub>30</sub> O <sub>16</sub> | 17.66 | 611.16066 |           |
| 39  | Flavonoid               | Cyanidin-3-O-arabioside                                  | C <sub>20</sub> H <sub>19</sub> O <sub>10</sub> | 17.72 | 419.09783 |           |
| 40  | Flavonoid               | Petunidin-3-O-galactoside                                | C <sub>22</sub> H <sub>23</sub> O <sub>12</sub> | 17.73 | 479.11895 |           |
| 41  | Carboxylic acid         | 4-Coumaric acid                                          | C <sub>9</sub> H <sub>8</sub> O <sub>3</sub>    | 17.73 |           | 163.03952 |
| 42  | Polyphenol              | Caffeoylshikimic acid                                    | C <sub>16</sub> H <sub>16</sub> O <sub>8</sub>  | 17.93 |           | 335.07670 |
| 43  | Polyphenol              | Feruloylquinic acid                                      | C <sub>17</sub> H <sub>20</sub> O <sub>9</sub>  | 17.94 |           | 367.10291 |
| 44  | Flavonoid               | Petunidin-3-O-arabioside                                 | C <sub>21</sub> H <sub>21</sub> O <sub>11</sub> | 18.35 | 449.10839 |           |
| 45  | Flavonoid               | Pelargonidin-O-hexoside                                  | C <sub>21</sub> H <sub>21</sub> O <sub>10</sub> | 18.47 | 433.11347 |           |
| 46  | Flavonoid               | Peonidin-O-hexoside                                      | C <sub>22</sub> H <sub>23</sub> O <sub>11</sub> | 18.86 | 463.12404 |           |
| 47  | Flavonoid               | Peonidin-O-(pentosyl)hexoside                            | C <sub>27</sub> H <sub>30</sub> O <sub>15</sub> | 18.93 | 595.16575 |           |
| 48  | Flavonoid               | Malvidin-O-hexoside                                      | C <sub>23</sub> H <sub>25</sub> O <sub>12</sub> | 19.00 | 493.13460 |           |
| 49  | Polyphenol              | Coumaroylquinic acid isomer 2                            | C <sub>16</sub> H <sub>18</sub> O <sub>8</sub>  | 19.15 |           | 337.09235 |
| 50  | Flavonoid               | Peonidin-3-O-arabioside                                  | C <sub>21</sub> H <sub>21</sub> O <sub>10</sub> | 19.27 | 433.11347 |           |
| 51  | Carboxylic acid         | Ferulic acid                                             | C <sub>10</sub> H <sub>10</sub> O <sub>4</sub>  | 19.27 |           | 193.05009 |
| 52  | Flavonoid               | Malvidin-3-O-arabioside                                  | C <sub>22</sub> H <sub>23</sub> O <sub>11</sub> | 19.70 | 463.12404 |           |
| 53  | Polyphenol              | Coumaroyl-shikimate                                      | C <sub>16</sub> H <sub>16</sub> O <sub>7</sub>  | 20.34 |           | 319.08178 |
| 54  | Flavonoid               | Myricetin-O-hexoside                                     | C <sub>21</sub> H <sub>20</sub> O <sub>13</sub> | 20.84 |           | 479.08257 |
| 55  | Flavonoid               | Myricetin-3-O-arabioside                                 | C <sub>20</sub> H <sub>18</sub> O <sub>12</sub> | 20.96 |           | 449.07201 |
| 56  | Iridoid                 | 7-Deoxyloganic acid                                      | C <sub>16</sub> H <sub>24</sub> O <sub>9</sub>  | 21.23 |           | 359.13421 |
| 57  | Flavonoid               | Peonidin-O-pentoside isomer                              | C <sub>21</sub> H <sub>21</sub> O <sub>10</sub> | 21.45 | 433.11347 |           |
| 58  | Flavonoid               | Myricetin-O-pentoside isomer                             | C <sub>20</sub> H <sub>18</sub> O <sub>12</sub> | 21.80 |           | 449.07201 |
| 59  | Miscellaneous           | Naringenin chalcone isomer 1                             | C <sub>15</sub> H <sub>12</sub> O <sub>5</sub>  | 22.35 | 273.07630 |           |
| 60  | Flavonoid               | Prunin (Naringenin 7-O-glucoside)                        | C <sub>21</sub> H <sub>22</sub> O <sub>10</sub> | 22.35 | 435.12912 |           |
| 61  | Flavonoid               | Hyperoside (Quercetin-3-O-galactoside, Hyperin)          | C <sub>21</sub> H <sub>20</sub> O <sub>12</sub> | 22.64 |           | 463.08765 |
| 62  | Miscellaneous           | Naringenin chalcone isomer 2                             | C <sub>15</sub> H <sub>12</sub> O <sub>5</sub>  | 22.65 | 273.07630 |           |
| 63  | Flavonoid               | Quercetin-3-O-glucuronide                                | C <sub>21</sub> H <sub>18</sub> O <sub>13</sub> | 22.66 |           | 477.06692 |
| 64  | Flavonoid               | Isoquercitrin (Hirsutrin, Quercetin-3-O-glucoside)       | C <sub>21</sub> H <sub>20</sub> O <sub>12</sub> | 22.89 |           | 463.08765 |
| 65  | Flavonoid               | Laricitrin (Myricetin-3'-O-methyl ether)                 | C <sub>16</sub> H <sub>12</sub> O <sub>8</sub>  | 23.20 | 333.06105 |           |
| 66  | Flavonoid               | Laricitrin-O-hexoside                                    | C <sub>22</sub> H <sub>22</sub> O <sub>13</sub> | 23.21 |           | 493.09822 |
| 67  | Flavonoid               | Avicularin (Quercetin-3-O-arabinofuranoside, Fencularin) | C <sub>20</sub> H <sub>18</sub> O <sub>11</sub> | 23.48 |           | 433.07709 |
| 68  | Flavonoid               | Myricetin                                                | C <sub>15</sub> H <sub>10</sub> O <sub>8</sub>  | 24.17 |           | 317.02974 |
| 69  | Flavonoid               | Cyanidin-O-(coumaroyl)hexoside isomer 1                  | C <sub>30</sub> H <sub>26</sub> O <sub>13</sub> | 24.32 | 595.14517 |           |
| 70  | Flavonoid               | Quercitrin (Quercetin-3-O-rhamnoside)                    | C <sub>21</sub> H <sub>20</sub> O <sub>11</sub> | 24.43 | 449.10839 |           |
| 71  | Flavonoid               | Kaempferol-3-O-glucuronide                               | C <sub>21</sub> H <sub>18</sub> O <sub>12</sub> | 24.59 |           | 461.07200 |
| 72  | Flavonoid               | Quercetin-O-rhamnoside-O-pentoside                       | C <sub>26</sub> H <sub>28</sub> O <sub>15</sub> | 24.63 | 581.15065 |           |
| 73  | Flavonoid               | Syringetin-O-hexoside                                    | C <sub>23</sub> H <sub>24</sub> O <sub>13</sub> | 24.97 |           | 507.11387 |
| 74  | Flavonoid               | Isorhamnetin-O-glucuronide                               | C <sub>22</sub> H <sub>20</sub> O <sub>13</sub> | 25.14 |           | 491.08257 |
| 75  | Flavonoid               | Malvidin-O-(coumaroyl)hexoside isomer 1                  | C <sub>32</sub> H <sub>31</sub> O <sub>14</sub> | 25.22 | 639.17139 |           |
| 76  | Terpenoid               | Abscisic acid                                            | C <sub>15</sub> H <sub>20</sub> O <sub>4</sub>  | 25.42 |           | 263.12834 |
| 77  | Flavonoid               | Cyanidin-O-(coumaroyl)hexoside isomer 2                  | C <sub>30</sub> H <sub>26</sub> O <sub>13</sub> | 25.49 | 595.14517 |           |

| No. | Chemical classification | Compound                                                    | Molecular formula | RT    | M [+]     | M [-]     |
|-----|-------------------------|-------------------------------------------------------------|-------------------|-------|-----------|-----------|
| 78  | Flavonoid               | Malvidin-O-(coumaroyl)hexoside isomer 2                     | C32H31O14         | 26.23 | 639.17139 |           |
| 79  | Flavonoid               | Peonidin-O-(coumaroyl)hexoside                              | C31H29O13         | 26.40 | 609.16082 |           |
| 80  | Flavonoid               | Quercetin-O-(coumaroyl)hexoside                             | C30H26O14         | 26.82 |           | 609.12498 |
| 81  | Flavonoid               | Quercetin-3-O-[3-Hydroxy-3-methylglutaroyl-(→4)-rhamnoside] | C27H28O15         | 26.84 |           | 591.13500 |
| 82  | Flavonoid               | Pentahydroxyflavone                                         | C15H10O7          | 27.00 |           | 301.03483 |
| 83  | Flavonoid               | Naringenin                                                  | C15H12O5          | 27.25 |           | 271.06065 |
| 84  | Flavonoid               | Trihydroxyflavanone                                         | C15H12O5          | 28.28 |           | 271.06065 |
| 85  | Miscellaneous           | Phytosphingosine                                            | C18H39NO3         | 39.88 | 318.30082 |           |

**Table S3.** Chemical composition of the ripe bilberry fruit hydro-methanolic (1:1 water:methanol ratio) extract (E3) determined using UHPLC-ESI-MS/MS. The chemical classification of the compounds was assigned for all compounds, along with the presented molecular formula, retention time (RT), radical molecular cations (M [+]) and anions (M [-]). Fragmentation pattern was omitted and can be found in **Table S4**.

| No. | Chemical classification | Compound                                                                    | Molecular formula                                             | RT    | M [+]     | M [-]     |
|-----|-------------------------|-----------------------------------------------------------------------------|---------------------------------------------------------------|-------|-----------|-----------|
| 1   | Amino acid              | Lysine                                                                      | C <sub>6</sub> H <sub>14</sub> N <sub>2</sub> O <sub>2</sub>  | 1.09  | 147.11336 |           |
| 2   | Amino acid              | Arginine                                                                    | C <sub>6</sub> H <sub>14</sub> N <sub>4</sub> O <sub>2</sub>  | 1.17  | 175.11951 |           |
| 3   | Amino acid              | Histidine                                                                   | C <sub>6</sub> H <sub>9</sub> N <sub>3</sub> O <sub>2</sub>   | 1.18  | 156.07731 |           |
| 4   | Amino acid              | Asparagine                                                                  | C <sub>4</sub> H <sub>8</sub> N <sub>2</sub> O <sub>3</sub>   | 1.21  | 133.06132 |           |
| 5   | Amino acid              | Glutamic acid                                                               | C <sub>5</sub> H <sub>9</sub> N <sub>1</sub> O <sub>4</sub>   | 1.21  | 148.06099 |           |
| 6   | Amino acid              | Threonine                                                                   | C <sub>4</sub> H <sub>9</sub> N <sub>1</sub> O <sub>3</sub>   | 1.21  | 120.06607 |           |
| 7   | Vitamin                 | Nicotinic acid (Niacin,B3)                                                  | C <sub>6</sub> H <sub>5</sub> N <sub>1</sub> O <sub>2</sub>   | 1.21  | 124.03986 |           |
| 8   | Sugar                   | Saccharic acid                                                              | C <sub>6</sub> H <sub>10</sub> O <sub>8</sub>                 | 1.22  |           | 209.02975 |
| 9   | Miscellaneous           | 5-Hydroxymethyl-2-furaldehyde                                               | C <sub>6</sub> H <sub>6</sub> O <sub>3</sub>                  | 1.24  | 127.03952 |           |
| 10  | Amino acid              | 2-Aminoadipic acid                                                          | C <sub>6</sub> H <sub>11</sub> N <sub>1</sub> O <sub>4</sub>  | 1.30  | 162.07664 |           |
| 11  | Miscellaneous           | 5-Methyl-2-furaldehyde                                                      | C <sub>6</sub> H <sub>6</sub> O <sub>2</sub>                  | 1.30  | 111.04461 |           |
| 12  | Lactone                 | Gulonic acid $\gamma$ -lactone or $\delta$ -Gluconic acid $\delta$ -lactone | C <sub>6</sub> H <sub>10</sub> O <sub>6</sub>                 | 1.30  | 179.05557 |           |
| 13  | Vitamin                 | Adenine                                                                     | C <sub>5</sub> H <sub>5</sub> N <sub>5</sub>                  | 1.30  | 136.06233 |           |
| 14  | Vitamin                 | Nicotinamide                                                                | C <sub>6</sub> H <sub>6</sub> N <sub>2</sub> O                | 1.43  | 123.05584 |           |
| 15  | Amino acid              | Tyrosine                                                                    | C <sub>9</sub> H <sub>11</sub> N <sub>1</sub> O <sub>3</sub>  | 1.65  | 182.08172 |           |
| 16  | Amino acid              | Isoleucin or Leucin                                                         | C <sub>6</sub> H <sub>13</sub> N <sub>1</sub> O <sub>2</sub>  | 1.91  | 132.10246 |           |
| 17  | Carboxylic acid         | Gallic acid (3,4,5-Trihydroxybenzoic acid)                                  | C <sub>7</sub> H <sub>6</sub> O <sub>5</sub>                  | 2.23  |           | 169.01370 |
| 18  | Amino acid              | Phenylalanine                                                               | C <sub>9</sub> H <sub>11</sub> N <sub>1</sub> O <sub>2</sub>  | 3.15  | 166.08681 |           |
| 19  | Flavonoid               | Gallocatechin                                                               | C <sub>15</sub> H <sub>14</sub> O <sub>7</sub>                | 4.22  |           | 305.06613 |
| 20  | Vitamin                 | Pantothenic acid (B5)                                                       | C <sub>9</sub> H <sub>17</sub> N <sub>1</sub> O <sub>5</sub>  | 4.99  | 220.11850 |           |
| 21  | Amino acid              | Tryptophan                                                                  | C <sub>11</sub> H <sub>12</sub> N <sub>2</sub> O <sub>2</sub> | 8.03  | 205.09771 |           |
| 22  | Ester                   | Methyl gallate                                                              | C <sub>8</sub> H <sub>8</sub> O <sub>5</sub>                  | 8.42  |           | 183.02935 |
| 23  | Carboxylic acid         | Dihydroxy-methoxybenzoic acid                                               | C <sub>8</sub> H <sub>8</sub> O <sub>5</sub>                  | 11.24 |           | 183.02935 |
| 24  | Flavonoid               | Procyanidin B1 or B3                                                        | C <sub>30</sub> H <sub>26</sub> O <sub>12</sub>               | 11.83 | 579.15025 |           |
| 25  | Flavonoid               | Catechin                                                                    | C <sub>15</sub> H <sub>14</sub> O <sub>6</sub>                | 13.21 |           | 289.07121 |
| 26  | Flavonoid               | Epigallocatechin                                                            | C <sub>15</sub> H <sub>14</sub> O <sub>7</sub>                | 13.47 |           | 305.06613 |
| 27  | Flavonoid               | Catechin or Epicatechin-O-hexoside                                          | C <sub>21</sub> H <sub>24</sub> O <sub>11</sub>               | 14.01 |           | 451.12404 |
| 28  | Polyphenol              | Chlorogenic acid (3-O-Caffeoylquinic acid)                                  | C <sub>16</sub> H <sub>18</sub> O <sub>9</sub>                | 14.12 | 355.10291 |           |
| 29  | Carboxylic acid         | Caffeic acid                                                                | C <sub>9</sub> H <sub>8</sub> O <sub>4</sub>                  | 14.29 |           | 179.03444 |
| 30  | Flavonoid               | Ampelopsin (Ampeloptin, Dihydromyricetin)                                   | C <sub>15</sub> H <sub>12</sub> O <sub>8</sub>                | 14.62 |           | 319.04540 |
| 31  | Flavonoid               | Procyanidin B1 or B3                                                        | C <sub>30</sub> H <sub>26</sub> O <sub>12</sub>               | 15.13 | 579.15025 |           |
| 32  | Flavonoid               | Cinnamtannin D1                                                             | C <sub>45</sub> H <sub>36</sub> O <sub>18</sub>               | 15.24 |           | 863.18234 |
| 33  | Miscellaneous           | Vanillin                                                                    | C <sub>8</sub> H <sub>8</sub> O <sub>3</sub>                  | 15.50 | 153.05517 |           |
| 34  | Carboxylic acid         | Dimethoxy-hydroxycinnamic acid                                              | C <sub>11</sub> H <sub>12</sub> O <sub>5</sub>                | 15.59 | 225.07630 |           |
| 35  | Flavonoid               | Cinnamtannin B1                                                             | C <sub>45</sub> H <sub>36</sub> O <sub>18</sub>               | 15.77 |           | 863.18234 |
| 36  | Flavonoid               | Delphinidin-3-O-galactoside (Empetrin)                                      | C <sub>21</sub> H <sub>21</sub> O <sub>12</sub>               | 15.98 | 465.10330 |           |

| No. | Chemical classification | Compound                                                    | Molecular formula                               | RT    | M [+]     | M [-]     |
|-----|-------------------------|-------------------------------------------------------------|-------------------------------------------------|-------|-----------|-----------|
| 37  | Flavonoid               | Delphinidin-O-(pentosyl)hexoside                            | C <sub>26</sub> H <sub>29</sub> O <sub>16</sub> | 16.26 | 597.14556 |           |
| 38  | Flavonoid               | Delphinidin-3-O-arabinoside                                 | C <sub>20</sub> H <sub>19</sub> O <sub>11</sub> | 16.77 | 435.09274 |           |
| 39  | Flavonoid               | Idaein (Idein, Cyanidin-3-O-galactoside)                    | C <sub>21</sub> H <sub>21</sub> O <sub>11</sub> | 16.79 | 449.10839 |           |
| 40  | Polyphenol              | Coumaroylquinic acid isomer 1                               | C <sub>16</sub> H <sub>18</sub> O <sub>8</sub>  | 16.82 |           | 337.09235 |
| 41  | Flavonoid               | Epicatechin                                                 | C <sub>15</sub> H <sub>14</sub> O <sub>6</sub>  | 17.03 |           | 289.07121 |
| 42  | Flavonoid               | Cyanidin-3-O-glucoside (Kuromanin, Asterin, Chrysanthemine) | C <sub>21</sub> H <sub>21</sub> O <sub>11</sub> | 17.38 | 449.10839 |           |
| 43  | Flavonoid               | Cyanidin-3-O-sambubioside (Sambicyanin, Gossypicyanin)      | C <sub>26</sub> H <sub>29</sub> O <sub>15</sub> | 17.66 | 581.15065 |           |
| 44  | Carboxylic acid         | 4-Coumaric acid                                             | C <sub>9</sub> H <sub>8</sub> O <sub>3</sub>    | 17.75 |           | 163.03952 |
| 45  | Flavonoid               | Cyanidin-3-O-arabinoside                                    | C <sub>20</sub> H <sub>19</sub> O <sub>10</sub> | 17.79 | 419.09783 |           |
| 46  | Flavonoid               | Petunidin-3-O-galactoside                                   | C <sub>22</sub> H <sub>23</sub> O <sub>12</sub> | 17.80 | 479.11895 |           |
| 47  | Polyphenol              | Caffeoylshikimic acid                                       | C <sub>16</sub> H <sub>16</sub> O <sub>8</sub>  | 17.94 |           | 335.07670 |
| 48  | Polyphenol              | Feruloylquinic acid                                         | C <sub>17</sub> H <sub>20</sub> O <sub>9</sub>  | 17.96 |           | 367.10291 |
| 49  | Flavonoid               | Petunidin-3-O-arabinoside                                   | C <sub>21</sub> H <sub>21</sub> O <sub>11</sub> | 18.37 | 449.10839 |           |
| 50  | Flavonoid               | Pelargonidin-O-hexoside                                     | C <sub>21</sub> H <sub>21</sub> O <sub>10</sub> | 18.55 | 433.11347 |           |
| 51  | Flavonoid               | Peonidin-O-hexoside                                         | C <sub>22</sub> H <sub>23</sub> O <sub>11</sub> | 18.87 | 463.12404 |           |
| 52  | Flavonoid               | Malvidin-O-hexoside                                         | C <sub>23</sub> H <sub>25</sub> O <sub>12</sub> | 19.00 | 493.13460 |           |
| 53  | Polyphenol              | Coumaroylquinic acid isomer 2                               | C <sub>16</sub> H <sub>18</sub> O <sub>8</sub>  | 19.17 |           | 337.09235 |
| 54  | Flavonoid               | Peonidin-3-O-arabinoside                                    | C <sub>21</sub> H <sub>21</sub> O <sub>10</sub> | 19.25 | 433.11347 |           |
| 55  | Carboxylic acid         | Ferulic acid                                                | C <sub>10</sub> H <sub>10</sub> O <sub>4</sub>  | 19.29 |           | 193.05009 |
| 56  | Flavonoid               | Malvidin-3-O-arabinoside                                    | C <sub>22</sub> H <sub>23</sub> O <sub>11</sub> | 19.63 | 463.12404 |           |
| 57  | Polyphenol              | Coumaroyl-shikimate                                         | C <sub>16</sub> H <sub>16</sub> O <sub>7</sub>  | 20.35 |           | 319.08178 |
| 58  | Flavonoid               | Myricetin-O-hexoside                                        | C <sub>21</sub> H <sub>20</sub> O <sub>13</sub> | 20.84 |           | 479.08257 |
| 59  | Flavonoid               | Myricetin-3-O-arabinoside                                   | C <sub>20</sub> H <sub>18</sub> O <sub>12</sub> | 20.97 |           | 449.07201 |
| 60  | Iridoid                 | 7-Deoxyloganic acid                                         | C <sub>16</sub> H <sub>24</sub> O <sub>9</sub>  | 21.24 |           | 359.13421 |
| 61  | Flavonoid               | Myricetin-O-pentoside isomer                                | C <sub>20</sub> H <sub>18</sub> O <sub>12</sub> | 21.82 |           | 449.07201 |
| 62  | Miscellaneous           | Naringenin chalcone isomer 1                                | C <sub>15</sub> H <sub>12</sub> O <sub>5</sub>  | 22.36 | 273.07630 |           |
| 63  | Flavonoid               | Prunin (Naringenin 7-O-glucoside)                           | C <sub>21</sub> H <sub>22</sub> O <sub>10</sub> | 22.37 | 435.12912 |           |
| 64  | Flavonoid               | Hyperoside (Quercetin-3-O-galactoside, Hyperin)             | C <sub>21</sub> H <sub>20</sub> O <sub>12</sub> | 22.65 |           | 463.08765 |
| 65  | Miscellaneous           | Naringenin chalcone isomer 2                                | C <sub>15</sub> H <sub>12</sub> O <sub>5</sub>  | 22.66 | 273.07630 |           |
| 66  | Flavonoid               | Quercetin-3-O-glucuronide                                   | C <sub>21</sub> H <sub>18</sub> O <sub>13</sub> | 22.66 |           | 477.06692 |
| 67  | Flavonoid               | Isoquercitrin (Hirsutrin, Quercetin-3-O-glucoside)          | C <sub>21</sub> H <sub>20</sub> O <sub>12</sub> | 22.88 |           | 463.08765 |
| 68  | Flavonoid               | Laricitrin (Myricetin-3'-O-methyl ether)                    | C <sub>16</sub> H <sub>12</sub> O <sub>8</sub>  | 23.19 | 333.06105 |           |
| 69  | Flavonoid               | Laricitrin-O-hexoside                                       | C <sub>22</sub> H <sub>22</sub> O <sub>13</sub> | 23.21 |           | 493.09822 |
| 70  | Flavonoid               | Avicularin (Quercetin-3-O-arabinofuranoside, Fencularin)    | C <sub>20</sub> H <sub>18</sub> O <sub>11</sub> | 23.47 |           | 433.07709 |
| 71  | Flavonoid               | Myricetin                                                   | C <sub>15</sub> H <sub>10</sub> O <sub>8</sub>  | 24.18 |           | 317.02974 |
| 72  | Flavonoid               | Cyanidin-O-(coumaroyl)hexoside isomer 1                     | C <sub>30</sub> H <sub>26</sub> O <sub>13</sub> | 24.31 | 595.14517 |           |
| 73  | Flavonoid               | Quercitrin (Quercetin-3-O-rhamnoside)                       | C <sub>21</sub> H <sub>20</sub> O <sub>11</sub> | 24.43 | 449.10839 |           |
| 74  | Flavonoid               | Kaempferol-3-O-glucuronide                                  | C <sub>21</sub> H <sub>18</sub> O <sub>12</sub> | 24.59 |           | 461.07200 |
| 75  | Flavonoid               | Quercetin-O-rhamnoside-O-pentoside                          | C <sub>26</sub> H <sub>28</sub> O <sub>15</sub> | 24.61 | 581.15065 |           |
| 76  | Flavonoid               | Syringetin-O-hexoside                                       | C <sub>23</sub> H <sub>24</sub> O <sub>13</sub> | 24.98 |           | 507.11387 |

| No. | Chemical classification | Compound                                                    | Molecular formula | RT    | M [+]     | M [-]     |
|-----|-------------------------|-------------------------------------------------------------|-------------------|-------|-----------|-----------|
| 77  | Flavonoid               | Malvidin-O-(coumaroyl)hexoside isomer 1                     | C32H31O14         | 25.09 | 639.17139 |           |
| 78  | Flavonoid               | Isorhamnetin-O-glucuronide                                  | C22H20O13         | 25.13 |           | 491.08257 |
| 79  | Terpenoid               | Abscisic acid                                               | C15H20O4          | 25.42 |           | 263.12834 |
| 80  | Flavonoid               | Cyanidin-O-(coumaroyl)hexoside isomer 2                     | C30H26O13         | 25.48 | 595.14517 |           |
| 81  | Miscellaneous           | 4-Methoxycinnamaldehyde                                     | C10H10O2          | 25.74 | 163.07591 |           |
| 82  | Flavonoid               | Malvidin-O-(coumaroyl)hexoside isomer 2                     | C32H31O14         | 26.13 | 639.17139 |           |
| 83  | Flavonoid               | Peonidin-O-(coumaroyl)hexoside                              | C31H29O13         | 26.39 | 609.16082 |           |
| 84  | Flavonoid               | Quercetin-O-(coumaroyl)hexoside                             | C30H26O14         | 26.82 |           | 609.12498 |
| 85  | Flavonoid               | Quercetin-3-O-[3-Hydroxy-3-methylglutaroyl-(→4)-rhamnoside] | C27H28O15         | 26.83 |           | 591.13500 |
| 86  | Flavonoid               | Pentahydroxyflavone                                         | C15H10O7          | 27.02 |           | 301.03483 |
| 87  | Flavonoid               | Naringenin                                                  | C15H12O5          | 27.24 |           | 271.06065 |
| 88  | Flavonoid               | Trihydroxyflavanone                                         | C15H12O5          | 28.28 |           | 271.06065 |



**Table S4.** Centralized list of fragmentation products for the compounds identified in the three ripe bilberry fruit extracts – aqueous (E1), methanolic (E2), and hydro-methanolic (E3).

| Putative identification                                     | Fragm. 1 | Fragm. 2 | Fragm. 3 | Fragm. 4 | Fragm. 5 | Fragm. 6 |
|-------------------------------------------------------------|----------|----------|----------|----------|----------|----------|
| 2-Aminoadipic acid                                          | 144,0656 | 116,0709 | 98,0606  | 70,0658  | 55,0187  |          |
| 4-Coumaric acid                                             | 119,0489 | 93,0331  |          |          |          |          |
| 4-Methoxycinnamaldehyde                                     | 145,0649 | 135,0808 | 131,0492 | 121,0650 | 105,0704 | 55,0186  |
| 5-Hydroxymethyl-2-furaldehyde                               | 109,0288 | 97,0290  | 81,0341  | 69,0342  | 53,0394  |          |
| 5-Methyl-2-furaldehyde                                      | 93,0340  | 83,0497  | 81,0343  | 55,0550  | 53,0394  |          |
| 7-Deoxyloganic acid                                         | 197,0816 | 153,0911 | 135,0804 | 113,0230 | 109,0652 | 89,0230  |
| Abscisic acid                                               | 219,1385 | 204,1151 | 201,1279 | 152,0831 | 151,0752 | 139,0751 |
| Adenine                                                     | 119,0356 | 94,0404  | 92,0246  | 67,0299  |          |          |
| Ampelopsin (Ampeloptin, Dihydromyricetin)                   | 193,0138 | 178,9979 | 153,0184 | 125,0232 |          |          |
| Arginine                                                    | 158,0924 | 130,0977 | 116,0709 | 112,0872 | 70,0658  | 60,0564  |
| Asparagine                                                  | 116,0346 | 88,0399  | 87,0446  | 74,0243  | 70,0295  |          |
| Avicularin (Quercetin-3-O-arabinofuranoside, Fencularin)    | 301,0358 | 300,0281 | 271,0252 | 255,0299 | 178,9974 | 151,0023 |
| Caffeic acid                                                | 135,0440 | 107,0488 |          |          |          |          |
| Caffeoylshikimic acid                                       | 179,0342 | 161,0235 | 135,0441 |          |          |          |
| Catechin                                                    | 245,0820 | 205,0505 | 203,0709 | 151,0390 | 125,0232 | 109,0282 |
| Catechin or Epicatechin-O-hexoside                          | 289,0725 | 245,0821 | 203,0708 | 151,0391 | 125,0233 | 109,0282 |
| Chlorogenic acid (3-O-Caffeoylquinic acid)                  | 163,0390 | 145,0284 | 135,0442 | 117,0337 | 107,0494 | 89,0389  |
| Choline                                                     | 60,0815  | 59,0736  | 58,0657  |          |          |          |
| Cinnamtannin B1                                             | 711,1375 | 693,1273 | 573,1052 | 559,0894 | 289,0725 | 125,0231 |
| Cinnamtannin D1                                             | 711,1379 | 693,1243 | 573,1038 | 289,0721 | 245,0813 | 125,0232 |
| Coumaroyl-shikimate                                         | 163,0390 | 155,0343 | 119,0488 |          |          |          |
| Coumaroylquinic acid                                        | 191,0556 | 173,0457 | 163,0388 | 119,0488 | 93,0332  |          |
| Cyanidin-3-O-arabinoside                                    | 287,0549 | 241,0507 | 213,0543 |          |          |          |
| Cyanidin-3-O-glucoside (Kuromanin, Asterin, Chrysanthemine) | 287,0552 | 213,0546 | 137,0235 |          |          |          |
| Cyanidin-3-O-sambubioside (Sambicyanin, Gossypicyanin)      | 287,0550 |          |          |          |          |          |
| Cyanidin-O-(coumaroyl)hexoside                              | 287,0552 | 213,0539 | 147,0438 |          |          |          |
| Delphinidin-3-O-arabinoside                                 | 303,0498 | 257,0440 | 229,0489 |          |          |          |
| Delphinidin-3-O-galactoside (Empetrin)                      | 303,0502 | 257,0444 | 229,0493 |          |          |          |
| Delphinidin-O-(pentosyl)hexoside                            | 303,0501 | 257,0443 | 229,0491 |          |          |          |
| Dihydroxy-methoxybenzoic acid                               | 168,0055 | 140,0104 |          |          |          |          |
| Dimethoxy-hydroxycinnamic acid                              | 207,0651 | 192,0418 | 179,0704 | 175,0389 | 147,0440 | 119,0493 |
| Epicatechin                                                 | 245,0819 | 205,0506 | 203,0712 | 151,0391 | 125,0231 | 109,0282 |
| Epigallocatechin                                            | 261,0773 | 219,0660 | 179,0343 | 167,0340 | 137,0233 | 125,0231 |
| Ferulic acid                                                | 178,0263 | 149,0598 | 137,0237 | 134,0363 |          |          |
| Feruloylquinic acid                                         | 193,0498 | 191,0556 | 173,0447 | 93,0331  |          |          |
| Gallic acid (3,4,5-Trihydroxybenzoic acid)                  | 125,0231 | 97,0281  | 81,0332  | 79,0175  | 69,0331  |          |

| Putative identification                                                     | Fragm. 1 | Fragm. 2 | Fragm. 3 | Fragm. 4 | Fragm. 5 | Fragm. 6 |
|-----------------------------------------------------------------------------|----------|----------|----------|----------|----------|----------|
| Gallocatechin                                                               | 261,0773 | 219,0659 | 179,0342 | 167,0339 | 137,0232 | 125,0230 |
| Glutamic acid                                                               | 130,0501 | 102,0554 | 84,0450  | 56,0502  |          |          |
| Gulonic acid $\gamma$ -lactone or $\delta$ -Gluconic acid $\delta$ -lactone | 133,0497 | 125,0236 | 115,0393 | 97,0290  | 85,0290  | 73,0291  |
| Histidine                                                                   | 110,0716 | 95,0609  | 93,0453  | 83,0610  |          |          |
| Hyperoside (Quercetin-3-O-galactoside, Hyperin)                             | 301,0359 | 300,0279 | 271,0252 | 255,0298 | 178,9976 | 151,0025 |
| Idaein (Idein, Cyanidin-3-O-galactoside)                                    | 287,0552 | 213,0542 | 137,0235 |          |          |          |
| Isoleucin or Leucin                                                         | 86,0970  | 69,0706  |          |          |          |          |
| Isoquercitrin (Hirsutrin, Quercetin-3-O-glucoside)                          | 301,0360 | 300,0281 | 271,0253 | 255,0302 | 178,9976 | 151,0025 |
| Isorhamnetin-O-glucuronide                                                  | 315,0519 | 300,0283 | 271,0254 | 243,0305 |          |          |
| Kaempferol-3-O-glucuronide                                                  | 285,0409 | 229,0502 | 175,0236 | 113,0232 |          |          |
| Laricitrin (Myricetin-3'-O-methyl ether)                                    | 318,0376 | 301,0346 | 273,0396 | 245,0446 | 217,0497 | 153,0178 |
| Laricitrin-O-hexoside                                                       | 331,0465 | 330,0386 | 315,0152 | 287,0203 | 178,9976 |          |
| Lysine                                                                      | 130,0865 | 84,0813  | 67,0548  |          |          |          |
| Malvidin-3-O-arabinoside                                                    | 331,0812 | 315,0500 | 299,0560 | 287,0547 | 270,0518 | 242,0567 |
| Malvidin-O-(coumaroyl)hexoside                                              | 331,0812 | 315,0499 | 287,0548 | 270,0535 | 242,0575 |          |
| Malvidin-O-hexoside                                                         | 331,0812 | 315,0499 | 299,0551 | 287,0550 | 270,0523 | 242,0573 |
| Methyl gallate                                                              | 168,0055 | 124,0153 |          |          |          |          |
| Myricetin                                                                   | 271,0259 | 178,9979 | 165,0184 | 151,0026 | 137,0234 | 109,0282 |
| Myricetin-3-O-arabinoside                                                   | 316,0231 | 287,0202 | 271,0252 |          |          |          |
| Myricetin-O-hexoside                                                        | 317,0307 | 316,0229 | 287,0203 | 271,0251 | 242,0222 | 178,9978 |
| Myricetin-O-pentose isomer                                                  | 316,0229 | 287,0206 | 271,0257 |          |          |          |
| N-(2-Phenylethyl)acetamide                                                  | 122,0966 | 105,0703 | 103,0548 | 90,9481  | 79,0550  | 77,0391  |
| Naringenin                                                                  | 177,0184 | 165,0174 | 151,0025 | 119,0490 | 107,0126 | 93,0332  |
| Naringenin chalcone                                                         | 171,0287 | 153,0183 | 147,0442 | 123,0444 | 119,0493 |          |
| Nicotinamide                                                                | 106,0290 | 96,0448  | 80,0501  |          |          |          |
| Nicotinic acid (Niacin,B3)                                                  | 96,0450  | 80,0501  | 78,0343  |          |          |          |
| Pantothenic acid (B5)                                                       | 202,1076 | 184,0972 | 174,1121 | 116,0347 | 90,0555  | 72,0451  |
| Pelargonidin-O-hexoside                                                     | 271,0602 |          |          |          |          |          |
| Pentahydroxyflavone                                                         | 273,0411 | 257,0456 | 229,0501 | 178,9979 | 151,0026 | 107,0125 |
| Peonidin-3-O-arabinoside                                                    | 301,0707 | 286,0472 | 258,0526 |          |          |          |
| Peonidin-O-(coumaroyl)hexoside                                              | 301,0709 | 286,0472 | 258,0524 | 147,0438 |          |          |
| Peonidin-O-(pentosyl)hexoside                                               | 301,0709 | 286,0474 | 258,0528 |          |          |          |
| Peonidin-O-hexoside                                                         | 331,0811 | 301,0707 | 286,0472 | 258,0522 | 230,0576 | 201,0533 |
| Peonidin-O-pentose isomer                                                   | 301,0709 | 286,0475 | 258,0527 |          |          |          |
| Petunidin-3-O-arabinoside                                                   | 317,0656 | 302,0422 | 274,0473 | 245,0441 | 217,0495 | 203,0337 |
| Petunidin-3-O-galactoside                                                   | 317,0657 | 302,0422 | 274,0476 | 245,0446 | 217,0497 | 203,0335 |
| Petunidin-O-(pentosyl)hexoside                                              | 317,0658 | 302,0428 | 287,0549 | 274,0473 |          |          |
| Phenylalanine                                                               | 149,0597 | 131,0493 | 120,0810 | 107,0494 | 103,0546 | 93,0704  |
| Phytosphingosine                                                            | 300,2897 | 282,2794 | 270,2796 | 264,2667 | 252,2690 | 95,0858  |
| Procyanidin B1 or B3                                                        | 409,0922 | 287,0550 | 163,0390 | 139,0392 | 127,0392 | 123,0442 |

| Putative identification                                     | Fragm. 1 | Fragm. 2 | Fragm. 3 | Fragm. 4 | Fragm. 5 | Fragm. 6 |
|-------------------------------------------------------------|----------|----------|----------|----------|----------|----------|
| Prunin (Naringenin 7-O-glucoside)                           | 273,0758 | 171,0287 | 153,0182 | 147,0441 | 119,0494 | 91,0548  |
| Quercetin-3-O-[3-Hydroxy-3-methylglutaroyl-(→4)-rhamnoside] | 489,1026 | 447,0935 | 301,0359 | 300,0279 | 271,0255 | 151,0027 |
| Quercetin-3-O-glucuronide                                   | 301,0359 | 255,0299 | 178,9978 | 163,0027 | 151,0026 | 121,0281 |
| Quercetin-O-(coumaroyl)hexoside                             | 463,0885 | 301,0360 | 300,0281 | 271,0252 | 255,0301 | 151,0022 |
| Quercetin-O-rhamnoside-O-pentoside                          | 449,1077 | 413,0859 | 345,0610 | 303,0502 | 257,0451 |          |
| Quercitrin (Quercetin-3-O-rhamnoside)                       | 303,0501 | 257,0443 | 229,0487 | 129,0549 | 85,0290  | 71,0498  |
| Saccharic acid                                              | 191,0194 | 173,0081 | 147,0289 | 129,0183 | 111,0073 | 85,0280  |
| Syringetin-O-hexoside                                       | 344,0541 | 329,0307 | 316,0591 | 301,0358 | 273,0408 | 242,0218 |
| Threonine                                                   | 102,0554 | 84,0450  | 74,0607  | 56,0503  |          |          |
| Trihydroxyflavanone                                         | 177,0190 | 165,0184 | 151,0026 | 119,0489 | 107,0125 | 93,0332  |
| Tryptophan                                                  | 188,0707 | 170,0601 | 159,0917 | 146,0600 | 132,0809 | 118,0653 |
| Tyrosine                                                    | 165,0548 | 147,0442 | 136,0759 | 123,0443 | 119,0495 | 91,0548  |
| Vanillin                                                    | 125,0600 | 111,0445 | 93,0340  | 65,0393  |          |          |
| γ-Aminobutyric acid                                         | 87,0446  | 86,0606  | 69,0341  | 58,0657  |          |          |

**Table S5.** Phytochemicals found in extracts E1, E2, and E3, compared to substances previously reported in *Vaccinium myrtillus* or other *Vaccinium* spp.

| Putative identification                                    | <i>Vaccinium</i> spp. and plant part                                       |
|------------------------------------------------------------|----------------------------------------------------------------------------|
| Ampelopsin (Ampeloptin, Dihydromyricetin)                  | N/A                                                                        |
| Avicularin (Quercetin-3-O-arabinofuranoside, Fencularin)   | <i>V. myrtillus</i> L. – fruit [35]                                        |
| Catechin or Epicatechin-O-hexoside                         | <i>V. myrtillus</i> L. – fruit [35]                                        |
| Cinnamtannin B1                                            | <i>V. vitis-idaea</i> L. – fruit [36]                                      |
| Cinnamtannin D1                                            | <i>V. vitis-idaea</i> L. – fruit [36]                                      |
| Cyanidin-3-O-arabinoside                                   | <i>V. myrtillus</i> L. – fruit [37]                                        |
| Cyanidin-3-O-glucoside (Kuromanin, Asterin, Chrysanthemin) | <i>V. myrtillus</i> L. – fruit [35]                                        |
| Cyanidin-3-O-sambubioside (Sambicyanin, Gossypicyanin)     | <i>V. myrtillus</i> L. – fruit [38]                                        |
| Cyanidin-O-(coumaroyl)hexoside                             | N/A                                                                        |
| Delphinidin-3-O-arabinoside                                | <i>V. corymbosum</i> – fruit<br><i>V. myrtillus</i> L. – fruit [37]        |
| Delphinidin-3-O-galactoside (Empetrin)                     | <i>V. corymbosum</i> – fruit [39]<br><i>V. myrtillus</i> L. – fruit [37]   |
| Delphinidin-O-(pentosyl)hexoside                           | N/A                                                                        |
| Epicatechin                                                | <i>V. myrtillus</i> L. – fruit [37]                                        |
| Epigallocatechin                                           | <i>V. myrtillus</i> L. – fruit [37]                                        |
| Gallocatechin                                              | <i>V. myrtillus</i> L. – stems [24]                                        |
| Hyperoside (Quercetin-3-O-galactoside, Hyperin)            | <i>V. corymbosum</i> – fruit [39]                                          |
| Idaein (Idein, Cyanidin-3-O-galactoside)                   | <i>V. corymbosum</i> – fruit [39]<br><i>V. myrtillus</i> L. – fruit [37]   |
| Isoquercitrin (Hirsutrin, Quercetin-3-O-glucoside)         | <i>V. myrtillus</i> L. – fruit [37]                                        |
| Isorhamnetin-O-glucuronide                                 | <i>V. myrtillus</i> L. – fruit [35]                                        |
| Kaempferol-3-O-glucuronide                                 | <i>V. myrtillus</i> L. – fruit [35]                                        |
| Laricitrin (Myricetin-3'-O-methyl ether)                   | <i>V. myrtillus</i> L. – fruit [35]                                        |
| Laricitrin-O-hexoside                                      | <i>V. myrtillus</i> L. – fruit [40]                                        |
| Malvidin-3-O-arabinoside                                   | <i>V. corymbosum</i> – fruit [39]<br><i>V. myrtillus</i> L. – fruit [35]   |
| Malvidin-O-(coumaroyl)hexoside                             | N/A                                                                        |
| Malvidin-O-hexoside                                        | <i>V. corymbosum</i> – fruit [39]<br><i>V. myrtillus</i> L. – fruit [37]   |
| Myricetin                                                  | <i>V. myrtillus</i> L. – fruit [35]                                        |
| Myricetin-3-O-arabinoside                                  | <i>V. myrtillus</i> L. – fruit [40]                                        |
| Myricetin-O-hexoside                                       | <i>V. myrtillus</i> L. – fruit [35]                                        |
| Myricetin-O-pentoside isomer                               | <i>V. myrtillus</i> L. – fruit [35]                                        |
| Naringenin                                                 | N/A                                                                        |
| Naringenin chalcone                                        | N/A                                                                        |
| Pentahydroxyflavone<br>(Hypolaetin, Quercetin, Tricetin)   | <i>V. myrtillus</i> L. – fruit [35]                                        |
| Peonidin-3-O-arabinoside                                   | <i>V. myrtillus</i> L. – fruit [40]                                        |
| Peonidin-O-(coumaroyl)hexoside                             | N/A                                                                        |
| Peonidin-O-(pentosyl)hexoside                              | N/A                                                                        |
| Peonidin-O-hexoside                                        | <i>V. corymbosum</i> – fruit [39]<br><i>V. myrtillus</i> L. – fruit [37]   |
| Peonidin-O-pentoside isomer                                | N/A                                                                        |
| Petunidin-3-O-arabinoside                                  | <i>V. myrtillus</i> L. – fruit [37]<br><i>V. myrtillus</i> L. – fruit [35] |

| Putative identification                                     | Vaccinium spp. and plant part                                                                                   |
|-------------------------------------------------------------|-----------------------------------------------------------------------------------------------------------------|
| Petunidin-3-O-galactoside                                   | <i>V. corymbosum</i> – fruit [39]<br><i>V. myrtillus</i> L. – fruit [37]<br><i>V. myrtillus</i> L. – fruit [35] |
| Petunidin-O-(pentosyl)hexoside                              | N/A                                                                                                             |
| Procyanidin B1 or B3                                        | <i>V. myrtillus</i> L. – fruit [35]                                                                             |
| Prunin (Naringenin 7-O-glucoside)                           | N/A                                                                                                             |
| Quercetin-3-O-[3-Hydroxy-3-methylglutaroyl-(→4)-rhamnoside] | <i>V. myrtillus</i> L. – fruit [41]                                                                             |
| Quercetin-3-O-glucuronide                                   | <i>V. corymbosum</i> – fruit [39]<br><i>V. myrtillus</i> L. – fruit [37]<br><i>V. myrtillus</i> L. – fruit [35] |
| Quercetin-O-(coumaroyl)hexoside                             | N/A                                                                                                             |
| Quercetin-O-rhamnoside-O-pentoside                          | <i>V. myrtillus</i> L. – fruit [35]                                                                             |
| Quercitrin (Quercetin-3-O-rhamnoside)                       | <i>V. myrtillus</i> L. – fruit [35]                                                                             |
| Syringetin-O-hexoside                                       | <i>V. myrtillus</i> L. – fruit [35]                                                                             |
| Trihydroxyflavanone                                         | N/A                                                                                                             |
| 2-Aminoadipic acid                                          | N/A                                                                                                             |
| Arginine                                                    | N/A                                                                                                             |
| Asparagine                                                  | N/A                                                                                                             |
| Glutamic acid                                               | N/A                                                                                                             |
| Histidine                                                   | N/A                                                                                                             |
| Isoleucine or Leucine                                       | N/A                                                                                                             |
| Lysine                                                      | N/A                                                                                                             |
| Phenylalanine                                               | N/A                                                                                                             |
| Threonine                                                   | N/A                                                                                                             |
| Tryptophan                                                  | N/A                                                                                                             |
| Tyrosine                                                    | N/A                                                                                                             |
| γ-Aminobutyric acid (GABA)                                  | N/A                                                                                                             |
| Caffeoylshikimic acid                                       | <i>V. myrtillus</i> L. – fruit [41]                                                                             |
| Chlorogenic acid (3-O-Caffeoylquinic acid)                  | <i>V. myrtillus</i> L. – fruit [37]<br><i>V. myrtillus</i> L. – fruit [35]                                      |
| Coumaroylquinic acid                                        | <i>V. myrtillus</i> L. – fruit [35]                                                                             |
| Coumaroyl-shikimate                                         | <i>V. myrtillus</i> L. – fruit [35]                                                                             |
| Feruloylquinic acid                                         | <i>V. myrtillus</i> L. – fruit [35]                                                                             |
| Gallic acid (3,4,5-Trihydroxybenzoic acid)                  | <i>V. myrtillus</i> L. – fruit [35]                                                                             |
| 4-Coumaric acid                                             | <i>V. myrtillus</i> L. – fruit [35]                                                                             |
| Caffeic acid                                                | <i>V. myrtillus</i> L. – fruit [37]<br><i>V. myrtillus</i> L. – fruit [35]                                      |
| Dihydroxy-methoxybenzoic acid                               | N/A                                                                                                             |
| Dimethoxy-hydroxycinnamic acid (Sinapic acid)               | <i>V. myrtillus</i> L. – fruit [35]                                                                             |
| Ferulic acid                                                | <i>V. myrtillus</i> L. – fruit [35]                                                                             |
| Adenine                                                     | N/A                                                                                                             |
| Nicotinamide                                                | <i>V. myrtillus</i> L. – fruit [35]                                                                             |
| Nicotinic acid (B3)                                         | N/A                                                                                                             |
| Pantothenic acid (B5)                                       | <i>V. myrtillus</i> L. – fruit [35]                                                                             |
| Abcsicic acid (ABA)                                         | <i>V. myrtillus</i> L. – fruit [42]                                                                             |
| Saccharic acid                                              | N/A                                                                                                             |
| Gulonic acid γ-lactone or δ-Gluconic acid δ-lactone         | N/A                                                                                                             |
| Methyl gallate                                              | <i>V. myrtillus</i> L. – leaves [43]                                                                            |

| Putative identification       | Vaccinium spp. and plant part       |
|-------------------------------|-------------------------------------|
| Choline                       | N/A                                 |
| 7-Deoxyloganic acid           | N/A                                 |
| 4-Methoxycinnamaldehyde       | N/A                                 |
| 5-Hydroxymethyl-2-furaldehyde | <i>V. myrtillus</i> L. – fruit [44] |
| 5-Methyl-2-furaldehyde        | <i>V. myrtillus</i> L. – fruit [44] |
| N-(2-Phenylethyl)acetamide    | N/A                                 |
| Phytosphingosine              | N/A                                 |
| Vanillin                      | N/A                                 |

Note:

N/A = Non-applicable; no reference was found for the compound previously being identified in *Vaccinium* spp. in scientific literature.

**Table S6.** Summary of the analytical chemistry analysis of the extracts, with compounds pertaining to each extract (E1, E2, and E3) marked (×, ✓). Compounds are organized by chemical classification, along with the reported health implications and the model system used (i.e. biochemical and biophysical assays, cell culture, animal model, human trials).

| Chemical classification | Putative identification                                                  | E1 | E2 | E3 | Reported health implications                                                                                                                                                                                                                                                                                                                                                                                                                                                                                                 |
|-------------------------|--------------------------------------------------------------------------|----|----|----|------------------------------------------------------------------------------------------------------------------------------------------------------------------------------------------------------------------------------------------------------------------------------------------------------------------------------------------------------------------------------------------------------------------------------------------------------------------------------------------------------------------------------|
| Flavonoids              | Ampelopsin (Ampeloptin, Dihydromyricetin) <sup>C</sup>                   | ×  | ×  | ✓  | <ul style="list-style-type: none"> <li>ameliorates non-alcoholic streatohepatitis – human [45]</li> <li>antibacterial agent – bacteria, mouse, rat [46,47]</li> <li>anti-cancer agent – cell culture, mouse [48]</li> <li>anti-diabetic agent – rat [49]</li> <li>antioxidant – piglet [50]</li> <li>cardiovascular protective agent – mouse [51]</li> <li>hepatoprotective agent – mouse [52]</li> <li>immune response modulator – cell culture [53]</li> <li>neuroprotective agent – mouse [54]</li> </ul>                 |
|                         | Avicularin (Quercetin-3-O-arabinofuranoside, Fenicularin) <sup>A</sup>   | ✓  | ✓  | ✓  | <ul style="list-style-type: none"> <li>ameliorates obesity – cell culture [55]</li> <li>anti-allergic agent – human [56]</li> <li>anti-cancer agent – human [57]</li> <li>anti-diabetic agent – cell culture [55]</li> <li>antibacterial agent – bacteria [58]</li> <li>antidepressant – rat [59]</li> <li>antioxidant – cell culture [60]</li> <li>cardiovascular protective agent– cell culture [61]</li> <li>hepatoprotective agent – cell culture [61]</li> <li>immune response modulator – cell culture [62]</li> </ul> |
|                         | Catechin or Epicatechin-O-hexoside <sup>A</sup>                          | ✓  | ✓  | ✓  | <ul style="list-style-type: none"> <li>anti-cancer agent – hamster, rat [63]</li> <li>anti-diabetic agent – rat [63]</li> <li>antioxidant – rat [63]</li> <li>cardiovascular protective agent – rat [63]</li> <li>iron absorption modulator – rat [63]</li> </ul>                                                                                                                                                                                                                                                            |
|                         | Cinnamtannin B1 <sup>B</sup>                                             | ✓  | ✓  | ✓  | <ul style="list-style-type: none"> <li>anti-cancer agent – cell culture [564]</li> <li>anti-diabetic agent – cell culture [65]</li> <li>antibacterial agent – bacteria [66]</li> <li>antioxidant – cell culture, biochemical and biophysical assays [67]</li> <li>antiviral agent – cell culture [66]</li> </ul>                                                                                                                                                                                                             |
|                         | Cinnamtannin D1 <sup>B</sup>                                             | ✓  | ✓  | ✓  | <ul style="list-style-type: none"> <li>anti-cancer agent – cell culture [68]</li> <li>anti-diabetic agent – mouse, cell culture [69]</li> <li>antioxidant – biochemical and biophysical assays [70]</li> <li>immune response modulator – mouse, cell culture [71]</li> </ul>                                                                                                                                                                                                                                                 |
|                         | Cyanidin-3-O-arabinoside <sup>A</sup>                                    | ✓  | ✓  | ✓  | <ul style="list-style-type: none"> <li>antioxidant – cell culture [72]</li> <li>cardiovascular protective agent – cell culture and vascular rings [72]</li> <li>protective agent against epithelial dysfunction – cell culture [72]</li> </ul>                                                                                                                                                                                                                                                                               |
|                         | Cyanidin-3-O-glucoside (Kuromanin, Asterin, Chrysanthemine) <sup>A</sup> | ✓  | ✓  | ✓  | <ul style="list-style-type: none"> <li>ameliorates non-alcoholic streatohepatitis – mouse [73]</li> <li>anti-cancer agent – biochemical and biophysical assays [74], cell culture [75]</li> <li>anti-diabetic agent – cell culture [75]</li> <li>antioxidant – biochemical and biophysical assays [76]</li> <li>hepatoprotective agent – mouse [77]</li> <li>immune response modulator – cell culture [78]</li> </ul>                                                                                                        |

| Chemical classification | Putative identification                                             | E1 | E2 | E3 | Reported health implications                                                                                                                                                                                                                                                                                                                                                                                                                                                                                                                                                                                                                                                                                                    |
|-------------------------|---------------------------------------------------------------------|----|----|----|---------------------------------------------------------------------------------------------------------------------------------------------------------------------------------------------------------------------------------------------------------------------------------------------------------------------------------------------------------------------------------------------------------------------------------------------------------------------------------------------------------------------------------------------------------------------------------------------------------------------------------------------------------------------------------------------------------------------------------|
|                         |                                                                     |    |    |    | <ul style="list-style-type: none"> <li>UV photoprotective agent – cell culture [79]</li> </ul>                                                                                                                                                                                                                                                                                                                                                                                                                                                                                                                                                                                                                                  |
|                         | Cyanidin-3-O-sambubioside (Sambicyanin, Gossypicyanin) <sup>A</sup> | ✓  | ✓  | ✓  | <ul style="list-style-type: none"> <li>antioxidant – cell culture [80]</li> <li>neuroprotective agent – cell culture [80]</li> </ul>                                                                                                                                                                                                                                                                                                                                                                                                                                                                                                                                                                                            |
|                         | Cyanidin-O-(coumaroyl)hexoside <sup>C</sup>                         | x  | ✓  | ✓  | N/A                                                                                                                                                                                                                                                                                                                                                                                                                                                                                                                                                                                                                                                                                                                             |
|                         | Delphinidin-3-O-arabinoside <sup>A</sup>                            | ✓  | ✓  | ✓  | <ul style="list-style-type: none"> <li>anti-diabetic agent – cell culture [81]</li> <li>epidermal growth factor receptor inhibitor – cell culture [82]</li> </ul>                                                                                                                                                                                                                                                                                                                                                                                                                                                                                                                                                               |
|                         | Delphinidin-3-O-galactoside (Empetrin) <sup>A</sup>                 | ✓  | ✓  | ✓  | <ul style="list-style-type: none"> <li>epidermal growth factor receptor inhibitor – cell culture [82]</li> <li>hepatoprotective agent - mouse [83]</li> </ul>                                                                                                                                                                                                                                                                                                                                                                                                                                                                                                                                                                   |
|                         | Delphinidin-O-(pentosyl)hexoside <sup>C</sup>                       | x  | ✓  | ✓  | N/A                                                                                                                                                                                                                                                                                                                                                                                                                                                                                                                                                                                                                                                                                                                             |
|                         | Epicatechin <sup>A</sup>                                            | ✓  | ✓  | ✓  | <ul style="list-style-type: none"> <li>anti-cancer agent – cell culture [84]</li> <li>anti-diabetic agent – rat [85]</li> <li>antioxidant – biochemical and biophysical assays [86]</li> <li>cardiovascular protective agent – human [87, 88]</li> <li>improves endothelial function – human [89]</li> </ul>                                                                                                                                                                                                                                                                                                                                                                                                                    |
|                         | Epigallocatechin <sup>A</sup>                                       | ✓  | ✓  | ✓  | <ul style="list-style-type: none"> <li>anti-cancer agent – cell culture [90]</li> <li>antioxidant agent – biochemical and biophysical assays [86]</li> <li>cardiovascular protective agent – human [87]</li> <li>immune response modulator – cell culture [91]</li> <li>UV photoprotective agent – human [92]</li> </ul>                                                                                                                                                                                                                                                                                                                                                                                                        |
|                         | Gallocatechin <sup>A</sup>                                          | ✓  | ✓  | ✓  | <ul style="list-style-type: none"> <li>anti-cancer agent – cell culture [90]</li> <li>antioxidant – biochemical and biophysical assays [86]</li> <li>cardiovascular protective agent – human [87]</li> <li>immune response modulator – cell culture [91]</li> </ul>                                                                                                                                                                                                                                                                                                                                                                                                                                                             |
|                         | Hyperoside (Quercetin-3-O-galactoside, Hyperin) <sup>B</sup>        | ✓  | ✓  | ✓  | <ul style="list-style-type: none"> <li>anti-cancer agent – cell culture [93]</li> <li>anti-diabetic agent – rat [94]</li> <li>anti-nociceptive agent – biochemical and biophysical assays, cell culture, mouse [95]</li> <li>antidepressant – cell culture [96]</li> <li>antioxidant – cell culture [97]</li> <li>antiviral agent – cell culture [98]</li> <li>cardiovascular protective agent – rat [99]</li> <li>cytochrome P450 inhibitor – biochemical and biophysical assays, cell culture [100]</li> <li>gastroprotective agent – mouse [101]</li> <li>hepatoprotective agent – mouse [102]</li> <li>immune response modulator – mouse [103, 104]</li> <li>neuroprotective agent – cell culture, rat [105,106]</li> </ul> |
|                         | Idaein (Idein, Cyanidin-3-O-galactoside) <sup>A</sup>               | ✓  | ✓  | ✓  | <ul style="list-style-type: none"> <li>ameliorates obesity – mouse [107]</li> <li>anti-cancer agent – cell culture [108]</li> <li>antioxidant – biochemical and biophysical assays, cell culture [109], rat [110]</li> <li>neuroprotective agent – mouse [111]</li> </ul>                                                                                                                                                                                                                                                                                                                                                                                                                                                       |
|                         | Isoquercitrin (Hirsutrin, Quercetin-3-O-glucoside) <sup>A</sup>     | ✓  | ✓  | ✓  | <ul style="list-style-type: none"> <li>anti-allergic agent – guinea pig [112]</li> <li>anti-asthmatic agent – guinea pig [112]</li> </ul>                                                                                                                                                                                                                                                                                                                                                                                                                                                                                                                                                                                       |



| Chemical classification | Putative identification                               | E1 | E2 | E3 | Reported health implications                                                                                                                                                                                                                                                                                                                                                                                                                                                                                                                                                      |
|-------------------------|-------------------------------------------------------|----|----|----|-----------------------------------------------------------------------------------------------------------------------------------------------------------------------------------------------------------------------------------------------------------------------------------------------------------------------------------------------------------------------------------------------------------------------------------------------------------------------------------------------------------------------------------------------------------------------------------|
|                         |                                                       |    |    |    | <ul style="list-style-type: none"> <li>• anti-cancer agent – mouse [113]</li> <li>• anti-diabetic agent – rat [114]</li> <li>• antioxidant – mouse [115]</li> <li>• cardiovascular protective agent – rat [116]</li> <li>• immune response modulator – rat [117]</li> <li>• sedative – mouse [118]</li> </ul>                                                                                                                                                                                                                                                                     |
|                         | Isorhamnetin-O-glucuronide <sup>A</sup>               | ✓  | ✓  | ✓  | <ul style="list-style-type: none"> <li>• antioxidant – cell culture [119]</li> <li>• cardiovascular protective agent – rat [120]</li> <li>• immune response modulator – cell culture [119]</li> </ul>                                                                                                                                                                                                                                                                                                                                                                             |
|                         | Kaempferol-3-O-glucuronide <sup>A</sup>               | ✓  | ✓  | ✓  | <ul style="list-style-type: none"> <li>• ameliorates obesity – guinea pig [121]</li> <li>• angiotensin converting enzyme inhibitor – cell culture [122]</li> <li>• anti-cancer agent – cell culture [123]</li> <li>• anti-diabetic agent – rat [124]</li> <li>• antibacterial agent – bacteria, gerbil [125]</li> <li>• antioxidant – C.elegans [126], cell culture [127]</li> <li>• cardiovascular protective agent – cell culture [127], rat [128]</li> <li>• immune response modulator – cell culture [129]</li> <li>• increases thermotolerance – C. elegans [126]</li> </ul> |
|                         | Laricitrin (Myricetin-3'-O-methyl ether) <sup>A</sup> | ✓  | ✓  | ✓  | <ul style="list-style-type: none"> <li>• anti-cancer agent – cell culture [130]</li> <li>• immune response modulator – cell culture [130]</li> </ul>                                                                                                                                                                                                                                                                                                                                                                                                                              |
|                         | Laricitrin-O-hexoside <sup>A</sup>                    | ✓  | ✓  | ✓  | N/A                                                                                                                                                                                                                                                                                                                                                                                                                                                                                                                                                                               |
|                         | Malvidin-3-O-arabinoside <sup>A</sup>                 | ✓  | ✓  | ✓  | N/A                                                                                                                                                                                                                                                                                                                                                                                                                                                                                                                                                                               |
|                         | Malvidin-O-(coumaroyl)hexoside <sup>C</sup>           | x  | ✓  | ✓  | N/A                                                                                                                                                                                                                                                                                                                                                                                                                                                                                                                                                                               |
|                         | Malvidin-O-hexoside <sup>A</sup>                      | ✓  | ✓  | ✓  | N/A                                                                                                                                                                                                                                                                                                                                                                                                                                                                                                                                                                               |
|                         | Myricetin <sup>A</sup>                                | x  | ✓  | ✓  | <ul style="list-style-type: none"> <li>• anti-cancer agent – mouse [131]</li> <li>• anti-diabetic agent – cell culture, rat [132, 133]</li> <li>• antioxidant – biochemical and biophysical assays, cell culture [134]</li> <li>• antiviral agent – biochemical and biophysical assays, cell culture [135]</li> <li>• mutagenic agent – cell culture [136]</li> </ul>                                                                                                                                                                                                             |
|                         | Myricetin-3-O-arabinoside <sup>A</sup>                | ✓  | ✓  | ✓  | N/A                                                                                                                                                                                                                                                                                                                                                                                                                                                                                                                                                                               |
|                         | Myricetin-O-hexoside                                  | ✓  | ✓  | ✓  | N/A                                                                                                                                                                                                                                                                                                                                                                                                                                                                                                                                                                               |
|                         | Myricetin-O-pentoside isomer <sup>A</sup>             | ✓  | ✓  | ✓  | N/A                                                                                                                                                                                                                                                                                                                                                                                                                                                                                                                                                                               |
|                         | Naringenin <sup>C</sup>                               | ✓  | ✓  | ✓  | <ul style="list-style-type: none"> <li>• anti-cancer agent – cell culture, rat [137, 138]</li> <li>• anti-diabetic agent – mouse [139]</li> <li>• antidepressant – mouse [140]</li> <li>• antifilarial agent – worms, microfilaria [141]</li> <li>• antioxidant – rat [142]</li> <li>• cardiovascular protective agent – rat [143]</li> <li>• immune response modulator – cell culture [144]</li> </ul>                                                                                                                                                                           |
|                         | Naringenin chalcone <sup>C</sup>                      | x  | ✓  | ✓  | <ul style="list-style-type: none"> <li>• anti-allergic agent – mouse [145]</li> <li>• anti-cancer agent – cell culture [146]</li> <li>• antioxidant – biochemical and biophysical assays [147]</li> <li>• immune response modulator – cell culture [148]</li> </ul>                                                                                                                                                                                                                                                                                                               |

| Chemical classification | Putative identification                                                  | E1 | E2 | E3 | Reported health implications                                                                                                                                                                                                                                                                                                                                                                                |
|-------------------------|--------------------------------------------------------------------------|----|----|----|-------------------------------------------------------------------------------------------------------------------------------------------------------------------------------------------------------------------------------------------------------------------------------------------------------------------------------------------------------------------------------------------------------------|
|                         | Pentahydroxyflavone (Hypolaetin, Quercetin, Tricetin) <sup>A</sup>       | ✓  | ✓  | ✓  | <ul style="list-style-type: none"> <li>• anti-cancer agent – rat [149]</li> <li>• antioxidant – mouse [150]</li> <li>• cardiovascular protective agent – cell culture [151], rat [152]</li> <li>• immune response modulator – human [153]</li> </ul>                                                                                                                                                        |
|                         | Peonidin-3-O-arabinoside <sup>A</sup>                                    | ✓  | ✓  | ✓  | N/A                                                                                                                                                                                                                                                                                                                                                                                                         |
|                         | Peonidin-O-(coumaroyl)hexoside                                           | x  | ✓  | ✓  | N/A                                                                                                                                                                                                                                                                                                                                                                                                         |
|                         | Peonidin-O-(pentosyl)hexoside <sup>C</sup>                               | x  | ✓  | x  | N/A                                                                                                                                                                                                                                                                                                                                                                                                         |
|                         | Peonidin-O-hexoside <sup>A</sup>                                         | ✓  | ✓  | ✓  | N/A                                                                                                                                                                                                                                                                                                                                                                                                         |
|                         | Peonidin-O-pentoside isomer <sup>C</sup>                                 | x  | ✓  | x  | N/A                                                                                                                                                                                                                                                                                                                                                                                                         |
|                         | Petunidin-3-O-arabinoside <sup>A</sup>                                   | ✓  | ✓  | ✓  | N/A                                                                                                                                                                                                                                                                                                                                                                                                         |
|                         | Petunidin-3-O-galactoside <sup>A</sup>                                   | ✓  | ✓  | ✓  | N/A                                                                                                                                                                                                                                                                                                                                                                                                         |
|                         | Petunidin-O-(pentosyl)hexoside <sup>C</sup>                              | x  | ✓  | x  | N/A                                                                                                                                                                                                                                                                                                                                                                                                         |
|                         | Procyanidin B1 or B3 <sup>A</sup>                                        | ✓  | ✓  | ✓  | <ul style="list-style-type: none"> <li>• antioxidant – biochemical and biophysical assays, cell culture [154]</li> <li>• immune response modulator – cell culture [119]</li> </ul>                                                                                                                                                                                                                          |
|                         | Prunin (Naringenin 7-O-glucoside) <sup>C</sup>                           | ✓  | ✓  | ✓  | <ul style="list-style-type: none"> <li>• anti-diabetic agent – cell culture, mouse [155, 156]</li> <li>• antioxidant – cell culture [157]</li> <li>• cardiovascular protective agent – cell culture [158]</li> </ul>                                                                                                                                                                                        |
|                         | Quercetin-3-O-[3-Hydroxy-3-methylglutaroyl-(→4)-rhamnoside] <sup>A</sup> | ✓  | ✓  | ✓  | N/A                                                                                                                                                                                                                                                                                                                                                                                                         |
|                         | Quercetin-3-O-glucuronide <sup>A</sup>                                   | ✓  | ✓  | ✓  | <ul style="list-style-type: none"> <li>• angiogenesis inhibitor - biochemical and biophysical assays, cell culture [159]</li> <li>• anti-diabetic agent – biochemical and biophysical assays, cell culture [160]</li> <li>• antioxidant – rat [161]</li> <li>• immune response modulator – biochemical and biophysical assays, cell culture [160]</li> <li>• neuroprotective agent – mouse [162]</li> </ul> |
|                         | Quercetin-O-(coumaroyl)hexoside <sup>C</sup>                             | x  | ✓  | ✓  | N/A                                                                                                                                                                                                                                                                                                                                                                                                         |
|                         | Quercetin-O-rhamnoside-O-pentoside <sup>A</sup>                          | ✓  | ✓  | ✓  | N/A                                                                                                                                                                                                                                                                                                                                                                                                         |
|                         | Quercitrin (Quercetin-3-O-rhamnoside) <sup>A</sup>                       | ✓  | ✓  | ✓  | <ul style="list-style-type: none"> <li>• antibacterial agent – bacteria 5 [163]</li> <li>• antioxidant – biochemical and biophysical assays [164]</li> <li>• UV photoprotective agent – biochemical and biophysical assays [165]</li> </ul>                                                                                                                                                                 |
|                         | Syringetin-O-hexoside <sup>A</sup>                                       | ✓  | ✓  | ✓  | N/A                                                                                                                                                                                                                                                                                                                                                                                                         |
|                         | Trihydroxyflavanone <sup>C</sup>                                         | x  | ✓  | ✓  | <ul style="list-style-type: none"> <li>• anti-cancer agent – cell culture, rat [127, 138]</li> <li>• anti-diabetic agent – mouse [139]</li> <li>• antidepressant – mouse [140]</li> <li>• antifilarial agent – worms, microfilaria [141]</li> <li>• antioxidant – rat [142]</li> </ul>                                                                                                                      |

| Chemical classification | Putative identification          | E1 | E2 | E3                                                                                                                                                                                     | Reported health implications                                                                                                                                                                                                                                                                                             |
|-------------------------|----------------------------------|----|----|----------------------------------------------------------------------------------------------------------------------------------------------------------------------------------------|--------------------------------------------------------------------------------------------------------------------------------------------------------------------------------------------------------------------------------------------------------------------------------------------------------------------------|
|                         |                                  |    |    |                                                                                                                                                                                        | <ul style="list-style-type: none"> <li>cardiovascular protective agent – rat [143]</li> <li>immune response modulator – cell culture [144]</li> </ul>                                                                                                                                                                    |
| Amino acids             | 2-Aminoadipic acid <sup>c</sup>  | x  | ✓  | ✓                                                                                                                                                                                      | degradation product of lysine <ul style="list-style-type: none"> <li>anti-diabetic agent – mouse [164]</li> <li>marker for aging – human [165]</li> <li>marker for increased risk of developing diabetes – human [166]</li> <li>marker for sepsis – human [167]</li> <li>oxidative stress inducer – rat [168]</li> </ul> |
|                         | Arginine <sup>c</sup>            | ✓  | ✓  | ✓                                                                                                                                                                                      | conditionally essential amino acid in adults, creatine nitric oxide and ornithine precursor <ul style="list-style-type: none"> <li>anti-diabetic agent – rat [169], rabbit [170]</li> <li>cardiovascular protective agent – mouse, rabbit [171]</li> <li>immune response modulator – mouse [172]</li> </ul>              |
|                         | Asparagine <sup>c</sup>          | x  | ✓  | ✓                                                                                                                                                                                      | non-essential amino acid, precursor of ammonia, potential glycosylation site in the ER <ul style="list-style-type: none"> <li>metastasis promoter – mouse [173]</li> <li>neuroprotective agent – human [174]</li> </ul>                                                                                                  |
|                         | Glutamic acid <sup>c</sup>       | ✓  | x  | ✓                                                                                                                                                                                      | non-essential amino acid; responsible for the umami taste; neurotransmitter; precursor of GABA <ul style="list-style-type: none"> <li>ammonia level modulator – biochemical and biophysical assays [175]</li> <li>osmotic anionic balance modulator – rat [176]</li> </ul>                                               |
|                         | Histidine <sup>c</sup>           | ✓  | x  | ✓                                                                                                                                                                                      | essential amino acid, found in abundance in the active site of proteins; precursor of histamine <ul style="list-style-type: none"> <li>food intake suppressor – rat [177]</li> <li>marker for rheumatoid arthritis – human [178]</li> </ul>                                                                              |
|                         | Isoleucin or Leucin <sup>c</sup> | x  | ✓  | ✓                                                                                                                                                                                      | essential amino acid; precursor of alanine and glutamine <ul style="list-style-type: none"> <li>ameliorates obesity – human [179]</li> <li>ameliorates sarcopenia – rat [172], human [181]</li> <li>anti-diabetic agent – human [182]</li> </ul>                                                                         |
|                         | Lysine <sup>c</sup>              | ✓  | x  | ✓                                                                                                                                                                                      | essential amino acid; glutamate precursor <ul style="list-style-type: none"> <li>neuroprotective agent – mouse [183]</li> </ul>                                                                                                                                                                                          |
|                         | Phenylalanine                    | ✓  | ✓  | ✓                                                                                                                                                                                      | essential amino acid; tyrosine, phenethylamine, adrenaline, noradrenaline, melanin precursor <ul style="list-style-type: none"> <li>marker for phenylketonuria – human [184]</li> <li>neurotoxic agent – human [185]</li> </ul>                                                                                          |
|                         | Threonine <sup>c</sup>           | ✓  | ✓  | ✓                                                                                                                                                                                      | essential amino-acid; precursor of glycine; prodrug of mefenamic acid <ul style="list-style-type: none"> <li>analgesic – rat [186]</li> <li>immune response modulator – rat [186]</li> </ul>                                                                                                                             |
|                         | Tryptophan <sup>c</sup>          | ✓  | ✓  | ✓                                                                                                                                                                                      | essential amino-acid, precursor of serotonin and melatonin <ul style="list-style-type: none"> <li>antidepressant – human [187]</li> <li>anxiolytic – human [187]</li> <li>potential sleep aid – human [187]</li> </ul>                                                                                                   |
| Tyrosine <sup>c</sup>   | ✓                                | ✓  | ✓  | non-essential amino acid, found mainly in proteins involved in signal transduction pathways, as the residue can be phosphorylated/sulfated; precursor of L-DOPA, melanin, coenzyme Q10 |                                                                                                                                                                                                                                                                                                                          |

| Chemical classification | Putative identification                                    | E1 | E2 | E3 | Reported health implications                                                                                                                                                                                                                                                                                                                                                                                                                                                                                                                                              |
|-------------------------|------------------------------------------------------------|----|----|----|---------------------------------------------------------------------------------------------------------------------------------------------------------------------------------------------------------------------------------------------------------------------------------------------------------------------------------------------------------------------------------------------------------------------------------------------------------------------------------------------------------------------------------------------------------------------------|
|                         |                                                            |    |    |    | <ul style="list-style-type: none"> <li>ameliorates symptoms under stress (e.g. sleep deprivation, multitasking, coldness, fatigue, weight loss) – human, mouse [188]</li> </ul>                                                                                                                                                                                                                                                                                                                                                                                           |
|                         | $\gamma$ -Aminobutyric acid (GABA) <sup>C</sup>            | ✓  | ×  | ×  | <ul style="list-style-type: none"> <li>anti-diabetic agent – intact human pancreatic islets [189]</li> <li>immune response modulator – cell culture [190]</li> <li>neuroprotective agent – mouse [191]</li> </ul>                                                                                                                                                                                                                                                                                                                                                         |
| Polyphenols             | Caffeoylshikimic acid <sup>A</sup>                         | ✓  | ✓  | ✓  | N/A                                                                                                                                                                                                                                                                                                                                                                                                                                                                                                                                                                       |
|                         | Chlorogenic acid (3-O-Caffeoylquinic acid) <sup>A</sup>    | ✓  | ✓  | ✓  | <ul style="list-style-type: none"> <li>ameliorates dyslipidemia – rat [192]</li> <li>ameliorates obesity – mouse [193]</li> <li>anti-cancer – cell culture [194]</li> <li>anti-diabetic agent – human, mouse [195, 196]</li> <li>antibacterial agent – biochemical and biophysical assays [195]</li> <li>antioxidant – biochemical and biophysical assays [195]</li> <li>cardiovascular protective agent – mouse [195]; human [197]</li> <li>genotoxic agent – biochemical and biophysical assays, bacteria [198]</li> <li>neuroprotective agent – mouse [195]</li> </ul> |
|                         | Coumaroylquinic acid <sup>A</sup>                          | ✓  | ✓  | ✓  | N/A                                                                                                                                                                                                                                                                                                                                                                                                                                                                                                                                                                       |
|                         | Coumaroyl-shikimate <sup>A</sup>                           | ✓  | ✓  | ✓  | N/A                                                                                                                                                                                                                                                                                                                                                                                                                                                                                                                                                                       |
|                         | Feruloylquinic acid <sup>A</sup>                           | ✓  | ✓  | ✓  | N/A                                                                                                                                                                                                                                                                                                                                                                                                                                                                                                                                                                       |
|                         | Gallic acid (3,4,5-Trihydroxybenzoic acid) <sup>A</sup>    | ✓  | ✓  | ✓  | <ul style="list-style-type: none"> <li>anti-cancer agent – cell culture, mouse [199], biochemical and biophysical assays [200]</li> <li>antioxidant – biochemical and biophysical assays [201]</li> <li>immune response modulator – mouse [202]</li> <li>neuroprotective agent – cell culture, biochemical and biophysical assays [203]</li> </ul>                                                                                                                                                                                                                        |
| Carboxylic acids        | 4-Coumaric acid <sup>A</sup>                               | ✓  | ✓  | ✓  | <ul style="list-style-type: none"> <li>anti-cancer agent – rabbit [204]</li> <li>antioxidant – rabbit [204]</li> <li>immune response modulator – rat [205]</li> <li>male contraceptive – mouse [206]</li> <li>neuroprotective agent – rat [207]</li> </ul>                                                                                                                                                                                                                                                                                                                |
|                         | Caffeic acid <sup>A</sup>                                  | ✓  | ✓  | ✓  | <ul style="list-style-type: none"> <li>antioxidant – biochemical and biophysical assays [208]</li> <li>immune response modulator – cell culture [209]</li> </ul>                                                                                                                                                                                                                                                                                                                                                                                                          |
|                         | Dihydroxy-methoxybenzoic acid <sup>C</sup>                 | ×  | ✓  | ✓  | N/A                                                                                                                                                                                                                                                                                                                                                                                                                                                                                                                                                                       |
|                         | Dimethoxy-hydroxycinnamic acid (Sinapic acid) <sup>A</sup> | ✓  | ✓  | ✓  | <ul style="list-style-type: none"> <li>antioxidant – cell culture [210]</li> <li>immune response modulator – mouse [211]</li> </ul>                                                                                                                                                                                                                                                                                                                                                                                                                                       |
|                         | Ferulic acid <sup>A</sup>                                  | ✓  | ✓  | ✓  | <ul style="list-style-type: none"> <li>antioxidant – biochemical and biophysical assays [212]</li> <li>immune response modulator – cell culture [212]</li> <li>UV photoprotective agent - human [212]</li> </ul>                                                                                                                                                                                                                                                                                                                                                          |
| Vitamins                | Adenine <sup>C</sup>                                       | ×  | ✓  | ✓  | <ul style="list-style-type: none"> <li>anti-diabetic agent – rabbit [213]</li> <li>antiviral agent – cell culture, bacteria [214]</li> <li>cardiovascular protective agent – human, cat, rat [213]</li> <li>diuretic agent – dogs [213]</li> <li>increases muscle creatine levels – mouse [213]</li> <li>treats agranulocytosis and leukopenia – human [213]</li> </ul>                                                                                                                                                                                                   |

| Chemical classification | Putative identification                                                                  | E1 | E2 | E3 | Reported health implications                                                                                                                                                                                                                                                                                                                                                                                                             |
|-------------------------|------------------------------------------------------------------------------------------|----|----|----|------------------------------------------------------------------------------------------------------------------------------------------------------------------------------------------------------------------------------------------------------------------------------------------------------------------------------------------------------------------------------------------------------------------------------------------|
|                         | Nicotinamide <sup>A</sup>                                                                | ✓  | ✓  | ✓  | <ul style="list-style-type: none"> <li>ameliorates alcoholic liver disease – mouse [215]</li> <li>ameliorates granuloma annulare – human [216]</li> <li>ameliorates necrobiosis lipoidica – human [217]</li> <li>ameliorates pemphigoid – human [218]</li> <li>ameliorates polymorphous light eruption – human [219]</li> <li>anti-diabetic agent – human [220]</li> <li>neuroprotective agent – human [221]</li> </ul>                  |
|                         | Nicotinic acid (B3) <sup>C</sup>                                                         | ×  | ✓  | ✓  | <ul style="list-style-type: none"> <li>ameliorates erectile dysfunction – human [222]</li> <li>anti-diabetic agent – rat [223]</li> <li>cardiovascular protective agent – human [224]</li> <li>neuroprotective agent – human [225]</li> <li>prevents congenital malformations – mouse [226]</li> <li>ameliorates dyslipidemia – human [224]</li> <li>treats pellagra – human [227]</li> </ul>                                            |
|                         | Pantothenic acid (B5) <sup>A</sup>                                                       | ×  | ×  | ✓  | <ul style="list-style-type: none"> <li>ameliorates multiple sclerosis – mouse [228]</li> <li>ameliorates muscular cramps in pregnant women – human [229]</li> <li>ameliorates obesity – rats [230]</li> <li>anti-diabetic agent – mouse [231, 232]</li> <li>cardiovascular protective agent – human [233]</li> <li>immune response modulator – human [234]</li> <li>maintenance treatment for atopic dermatitis – human [235]</li> </ul> |
| Terpenoids              | Abscisic acid (ABA) <sup>A</sup>                                                         | ✓  | ✓  | ✓  | <ul style="list-style-type: none"> <li>anti-diabetic agent – rat [236]</li> <li>neuroprotective agent – rat [237]</li> <li>ameliorates attention deficit disorder – rat [238]</li> <li>ameliorates prostate enlargement – rat [238]</li> <li>immune response modulator – rat [238]</li> </ul>                                                                                                                                            |
| Sugars                  | Saccharic acid <sup>C</sup>                                                              | ✓  | ✓  | ✓  | N/A                                                                                                                                                                                                                                                                                                                                                                                                                                      |
| Lactones                | Gulonic acid $\gamma$ -lactone or $\delta$ -Gluconic acid $\delta$ -lactone <sup>C</sup> | ✓  | ✓  | ✓  | N/A                                                                                                                                                                                                                                                                                                                                                                                                                                      |
| Esters                  | Methyl gallate <sup>A</sup>                                                              | ✓  | ✓  | ✓  | <ul style="list-style-type: none"> <li>anti-cancer agent – cell culture [239]</li> <li>antioxidant – cell culture [240]</li> <li>immune response modulator – mouse [241]</li> </ul>                                                                                                                                                                                                                                                      |
| Alkaloids               | Choline <sup>C</sup>                                                                     | ✓  | ×  | ×  | <ul style="list-style-type: none"> <li>choline-phospholipids various functions – human [242]</li> <li>control of neural and muscle function as acetylcholine – human [243]</li> <li>ameliorates non-alcoholic streatohepatitis – mouse, rat, cell culture [244]</li> <li>lipotropic agent – rats [245]</li> </ul>                                                                                                                        |
| Iridoids                | 7-Deoxyloganic acid <sup>C</sup>                                                         | ×  | ✓  | ✓  | <ul style="list-style-type: none"> <li>immune response modulator – biochemical and biophysical assays [246]</li> </ul>                                                                                                                                                                                                                                                                                                                   |
| Miscellaneous           | 4-Methoxycinnamaldehyde <sup>C</sup>                                                     | ×  | ×  | ✓  | <ul style="list-style-type: none"> <li>anti-cancer agent – cell culture [247]</li> <li>cardiovascular protective agent – rat and cell culture [248]</li> <li>immune response modulator – cell culture [249]</li> </ul>                                                                                                                                                                                                                   |
|                         | 5-Hydroxymethyl-2-furaldehyde <sup>A</sup>                                               | ✓  | ✓  | ✓  | immediate and complete elimination from the body – rat [250]                                                                                                                                                                                                                                                                                                                                                                             |

| Chemical classification | Putative identification                 | E1 | E2 | E3 | Reported health implications                                                                                                                                                                                                                                                                                                                                                                                                                                                                                                                                                                                       |
|-------------------------|-----------------------------------------|----|----|----|--------------------------------------------------------------------------------------------------------------------------------------------------------------------------------------------------------------------------------------------------------------------------------------------------------------------------------------------------------------------------------------------------------------------------------------------------------------------------------------------------------------------------------------------------------------------------------------------------------------------|
|                         | 5-Methyl-2-furaldehyde <sup>A</sup>     | ✓  | ✓  | ✓  | N/A                                                                                                                                                                                                                                                                                                                                                                                                                                                                                                                                                                                                                |
|                         | N-(2-Phenylethyl)acetamide <sup>C</sup> | ✓  | ×  | ×  | N/A                                                                                                                                                                                                                                                                                                                                                                                                                                                                                                                                                                                                                |
|                         | Phytosphingosine <sup>C</sup>           | ×  | ✓  | ×  | <ul style="list-style-type: none"> <li>• anti-cancer agent – cell culture [251]</li> <li>• anti-melanogenic agent – cell culture [252]</li> <li>• immune response modulator – mouse [253]</li> </ul>                                                                                                                                                                                                                                                                                                                                                                                                               |
|                         | Vanillin <sup>C</sup>                   | ×  | ✓  | ✓  | <ul style="list-style-type: none"> <li>• neuroprotective agent – mouse [254]</li> <li>• anti-diabetic agent – biochemical and biophysical assays and cell culture [255]</li> <li>• ameliorates sickle cell anemia – biochemical and biophysical assays, cell culture [256, 257]</li> <li>• anti-cancer agent – mouse, cell culture, and biochemical and biophysical assays [258]</li> <li>• antioxidant – biochemical and biophysical assays [259], rat [260]</li> <li>• immune response modulator – rat [260]</li> <li>• hepatoprotective agent – rat [260]</li> <li>• ameliorates obesity – rat [261]</li> </ul> |

Note:

N/A = Non-applicable; no reference was found for the compound to have a biological activity according to scientific literature.

<sup>A</sup> The phytochemical was previously reported in *Vaccinium myrtillus* (Table S5)

<sup>B</sup> The phytochemical was previously reported in other *Vaccinium* spp., but not in *Vaccinium myrtillus* (Table S5)

<sup>C</sup> The phytochemical was not previously reported in any *Vaccinium* spp. (Table S5)

**Table S7.** PCR primer sequences for the genes used in the experiments, alongside their efficiency.

| Oligo name    | Sequence                   | Efficiency | Probe |
|---------------|----------------------------|------------|-------|
| ilp5_qPCR_F1  | ATGGACATGCTGAGGGTTG        | 1,53       | 123   |
| ilp5_qPCR_R1  | AATCGAATAGGCCCAAGGTG       |            | 123   |
| ilp6_qPCR_F1  | GGCCCTTGGCGATGTATTC        | 1,8        | 4     |
| ilp6_qPCR_R1  | AATCGGTTACGTTCTGCAAGTC     |            | 4     |
| ilp2_qPCR_F1  | CCGACAGCGATCTGGAC          | 1,68       | 63    |
| ilp2_qPCR_R1  | CACTTCGCAGCGGTTCC          |            | 63    |
| SIFa_qPCR_F1  | ACTCACTCTGCTCCTGGTC        | 2          | 46    |
| SIFa_qPCR_R1  | AGTCTAGGCTGTTGCGTTTG       |            | 46    |
| pdf_qPCR_F1   | AACGATGCGGGCAAGTAAG        | 1,7        | 161   |
| pdf_qPCR_R1   | CAGGTTCCATCTTTCAGTGGTG     |            | 161   |
| CNMa_qPCR_F1  | CTACGGCGACCAGTTGAAG        | 2          | 18    |
| CNMa_qPCR_R1  | ACTTCTGGCGAAAGCC           |            | 18    |
| Thor F        | CCAGATGCCCCGAGGTGTA        | 1.8        | 22    |
| Thor R        | AGCCCGCTCGTAGATAAGTTT      |            | 22    |
| tobi F        | TGGATTCTGGTGAACCTGTG       | 2          | 138   |
| tobi R        | TCGCCCAAAAGGAACATCAT       |            | 138   |
| InR F         | ACGACAACAAAACCGTTGC        | 2.00       | 141   |
| InR R         | TTCACGTGATCTCAATCATGC      |            | 141   |
| Akh_qPCR_F1   | ATTGCAGCCGTGCTCTTC         | 1.82       | 47    |
| Akh_qPCR_R1   | AGGTTCCAGGACCAGCTC         |            | 47    |
| Nplp3_qPCR_F1 | TGTTCAAGCTGTGCGTCTTC       | 1.84       | 24    |
| Nplp3_qPCR_R1 | AATGAGACCAGGAGCAGGAG       |            | 24    |
| Eip75B F      | ATTACGGCGTGCATTCTC         | 1.68       | 58    |
| Eip75B R      | GGGCGATACTGGATCTTTTG       |            | 58    |
| Hr96 F        | CCAGCGAGGCTCTTTATGAT       | 1.78       | 153   |
| Hr96 R        | CGAGTGTCGTCGGGCTTA         |            | 153   |
| Ide F         | AGAACCTAATTCTTCGACTGCTG    | 1.67       | 99    |
| Ide R         | GTCCGCGGAGATTTATGAGT       |            | 99    |
| CCAP_qPCR_F1  | ATCATGTGCGAGGCCAAA         | 2.00       | 147   |
| CCAP_qPCR_R1  | TTTGCCGAAAGATTTCCTTGC      |            | 147   |
| Npc2g_qPCR_F1 | TTCGACTCACGCCGAAC          | 2.00       | 117   |
| Npc2g_qPCR_R1 | CTCCACATTCTCGCTCTTGG       |            | 117   |
| CCHa2_qPCR_F1 | CCATATCTTTGCTACTGGTCGTTATC | 1.85       | 162   |
| CCHa2_qPCR_R1 | ACCGTAGGCCTGGCATC          |            | 162   |
| AstC_qPCR_F1  | CCAGGCAATCTATCCAATATTCC    | 2.00       | 140   |
| AstC_qPCR_R1  | CTCCTCAAATAGGCGCTGTAAC     |            | 140   |
| AstA F        | TTCAGCGGCATTGGAAAT         | 1.90       | 66    |
| AstA R        | GAAGGGAGTTCATTGTGATGC      |            | 66    |
| CG15618 F     | CTTCCTGGCGATCTCCT          | 2.00       | 164   |
| CG15618 R     | CGCATTGTCCGAGAAGAGTT       |            | 164   |
| Irk1 F        | AACGCTTCCAAGTGGTGGT        | 1.80       | 67    |
| Irk1 R        | CTGTGTGGTCATGCCAGTG        |            | 67    |
| Usp_qPCR_F1   | AATAAACAACCGTCACCTTGC      | 1.80       | 71    |
| Usp_qPCR_R1   | TTAAAGCGCTAATGCCCATC       |            | 71    |

**Table S8.** Hemolymph trehalose levels for *Drosophila melanogaster* Canton Special exposed to high sugar diet with and without supplementation of hydro-methanolic bilberry extract (E3). Data reported as average of triplicate experiments.

| <b>Media used</b>                                        | <b>Mean hemolymph trehalose level [mg/L]</b> | <b>Standard deviation [mg/L]</b> |
|----------------------------------------------------------|----------------------------------------------|----------------------------------|
| Normal diet + hydro-methanolic bilberry extract (E3)     | 289                                          | 6.16                             |
| High sugar diet + hydro-methanolic bilberry extract (E3) | 447                                          | 35.12                            |
| Normal diet control                                      | 457                                          | 14.26                            |
| High sugar diet control                                  | 943                                          | 34.98                            |

**Table S9.** Preference index for hydro-methanolic bilberry extract (E3) supplementation for *Drosophila melanogaster* Canton Special compared to normal media alone. Data reported as average of triplicate experiments.

| <b>Media used</b>                                             | <b>Mean preference index</b> | <b>Standard deviation</b> |
|---------------------------------------------------------------|------------------------------|---------------------------|
| Normal diet + hydroxy-methanolic bilberry extract (E3) - red  | 0.43                         | 0.02                      |
| Normal diet control - blue                                    | 0.48                         | 0.04                      |
| Normal diet + hydroxy-methanolic bilberry extract (E3) - blue | 0.52                         | 0.04                      |
| Normal diet control - red                                     | 0.47                         | 0.02                      |
